# Supplementary material for: Molybdenum imidazole citrate and bipyridine homocitrate in different oxidation states – balance between coordinated α-hydroxy and α-alkoxy groups
Source: Royal Society of Chemistry journal article supplement (doi:10.1039/c8ra09134j), 2019-01-01
Supplement: c8ra09134j1.pdf [file c8ra09134j1.pdf]

## Supporting materials

### Molybdenum imidazole citrate and bipyridine homocitrate in different oxidation states – Balance between coordinated $\alpha$ -hydroxy and $\alpha$ -alkoxy groups

Si-Yuan Wang, Zhao-Hui Zhou\*

State Key Laboratory for Physical Chemistry of Solid Surfaces, College of Chemistry and Chemical Engineering, Xiamen University, Xiamen, 361005, China,  
zhzhou@xmu.edu.cn, Tel: + 86-592-2184531; Fax: + 86-592-2183047

#### Figure and Table Options

**Figure S1.** Perspective view of the anion structure in  $K_2\{Mo_3^{IV}O_4(im)_3[Mo^{VI}O_3(Hcit)]_2\} \cdot 3im \cdot 4H_2O$  (**1**).

**Figure S2.** 2D layered structure of  $K_2\{Mo_3^{IV}O_4(im)_3[Mo^{VI}O_3(Hcit)]_2\} \cdot 3im \cdot 4H_2O$  (**1**).

**Figure S3.** 2D layered structure of  $K_2\{Mo_3^{IV}O_4(im)_3[Mo^{VI}O_3(Hcit)]_2\} \cdot 3im \cdot 4H_2O$  (**1**) viewed along *a* axis.

**Figure S4.** 2D layered structure of  $(Him)_2\{Mo_3^{IV}SO_3(im)_3[Mo^{VI}O_3(Hcit)]_2\} \cdot im \cdot 6H_2O$  (**2**).

**Figure S5.** The 3D supramolecular are linked through hydrogen bonds in  $K_2\{Mo_3^{IV}O_4(im)_3[Mo^{VI}O_3(Hcit)]_2\} \cdot 3im \cdot 4H_2O$  (**1**) viewed along *a* axis.

**Figure S6.** The 3D supramolecular are linked through hydrogen bonds in  $K_2\{Mo_3^{IV}O_4(im)_3[Mo^{VI}O_3(Hcit)]_2\} \cdot 3im \cdot 4H_2O$  (**1**) viewed along *b* axis.

**Figure S7.** The 3D supramolecular are linked through hydrogen bonds in  $(Him)_2\{Mo_3^{IV}SO_3(im)_3[Mo^{VI}O_3(Hcit)]_2\} \cdot im \cdot 6H_2O$  (**2**).

**Figure S8.** 3D water layers in  $(Him)_2\{Mo_3^{IV}SO_3(im)_3[Mo^{VI}O_3(Hcit)]_2\} \cdot im \cdot 6H_2O$  (**2**).

**Figure S9.** 2D layered structure of *trans*- $[(Mo^{VO})_2O(H_2homocit)_2(bpy)_2] \cdot 4H_2O$  (**3**).

**Figure S10.** 2D layered structure of  $(Et_4N)[Mo^{VI}O_2Cl(H_2cit)] \cdot H_2O$  (**4**).

**Figure S11.** 2D water layers in  $(Et_4N)[Mo^{VI}O_2Cl(H_2cit)] \cdot H_2O$  (**4**).

**Figure S12.**  $^1H$  NMR spectrum of  $K_2\{Mo_3^{IV}O_4(im)_3[Mo^{VI}O_3(Hcit)]_2\} \cdot 3im \cdot 4H_2O$  (**1**).

**Figure S13.**  $^1H$  NMR spectrum of  $(Him)_2\{Mo_3^{IV}SO_3(im)_3[Mo^{VI}O_3(Hcit)]_2\} \cdot im \cdot 6H_2O$  (**2**).

**Figure S14.**  $^{13}C$  NMR spectrum of  $(Et_4N)[Mo^{VI}O_2Cl(H_2cit)] \cdot H_2O$  (**4**).

**Figure S15.**  $^1H$  NMR spectrum of  $(Et_4N)[Mo^{VI}O_2Cl(H_2cit)] \cdot H_2O$  (**4**).

**Figure S16.**  $^{13}C$  NMR spectrum of  $K_2\{Mo_3^{IV}O_4(im)_3[Mo^{VI}O_3(Hcit)]_2\} \cdot 3im \cdot 4H_2O$  (**1**) after three months.

**Figure S17.**  $^1H$  NMR spectrum of  $K_2\{Mo_3^{IV}O_4(im)_3[Mo^{VI}O_3(Hcit)]_2\} \cdot 3im \cdot 4H_2O$  (**1**) after three months.

**Figure S18.**  $^{13}\text{C}$  NMR spectrum of  $(\text{Him})_2\{\text{Mo}_3^{\text{IV}}\text{SO}_3(\text{im})_3[\text{Mo}^{\text{VI}}\text{O}_3(\text{Hcit})]_2\}\cdot\text{im}\cdot 6\text{H}_2\text{O}$  (**2**) after three months.

**Figure S19.**  $^1\text{H}$  NMR spectrum of  $(\text{Him})_2\{\text{Mo}_3^{\text{IV}}\text{SO}_3(\text{im})_3[\text{Mo}^{\text{VI}}\text{O}_3(\text{Hcit})]_2\}\cdot\text{im}\cdot 6\text{H}_2\text{O}$  (**2**) after three months.

**Figure S20.**  $^{13}\text{C}$  NMR spectrum of  $(\text{Et}_4\text{N})[\text{Mo}^{\text{VI}}\text{O}_2\text{Cl}(\text{H}_2\text{cit})]\cdot\text{H}_2\text{O}$  (**4**) after three months.

**Figure S21.**  $^1\text{H}$  NMR spectrum of  $(\text{Et}_4\text{N})[\text{Mo}^{\text{VI}}\text{O}_2\text{Cl}(\text{H}_2\text{cit})]\cdot\text{H}_2\text{O}$  (**4**) after three months.

**Figure S22.** XPS spectrum of  $(\text{Him})_2\{\text{Mo}_3^{\text{IV}}\text{SO}_3(\text{im})_3[\text{Mo}^{\text{VI}}\text{O}_3(\text{Hcit})]_2\}\cdot\text{im}\cdot 6\text{H}_2\text{O}$  (**2**).

**Figure S23.** Plots of the experimental temperature dependence of  $\chi_M^{-1}$  and  $\chi_M T$  for  $(\text{Him})_2\{\text{Mo}_3^{\text{IV}}\text{SO}_3(\text{im})_3[\text{Mo}^{\text{VI}}\text{O}_3(\text{Hcit})]_2\}\cdot\text{im}\cdot 6\text{H}_2\text{O}$  (**2**).

**Figure S24.** Plots of the experimental temperature dependence of  $\chi_M^{-1}$  and  $\chi_M T$  for *trans*- $[(\text{Mo}^{\text{V}}\text{O})_2\text{O}(\text{H}_2\text{homocit})_2(\text{bpy})_2] 4\text{H}_2\text{O}$  (**3**).

**Figure S25.** IR spectra of  $\text{K}_2\{\text{Mo}_3^{\text{IV}}\text{O}_4(\text{im})_3[\text{Mo}^{\text{VI}}\text{O}_3(\text{Hcit})]_2\}\cdot 3\text{im}\cdot 4\text{H}_2\text{O}$  (**1**) and  $(\text{Him})_2\{\text{Mo}_3^{\text{IV}}\text{SO}_3(\text{im})_3[\text{Mo}^{\text{VI}}\text{O}_3(\text{Hcit})]_2\}\cdot\text{im}\cdot 6\text{H}_2\text{O}$  (**2**).

**Figure S26.** IR spectrum of *trans*- $[(\text{Mo}^{\text{V}}\text{O})_2\text{O}(\text{H}_2\text{homocit})_2(\text{bpy})_2] 4\text{H}_2\text{O}$  (**3**).

**Figure S27.** IR spectrum of  $(\text{Et}_4\text{N})[\text{Mo}^{\text{VI}}\text{O}_2\text{Cl}(\text{H}_2\text{cit})]\cdot\text{H}_2\text{O}$  (**4**).

**Figure S28.** UV-vis spectra of  $\text{K}_2\{\text{Mo}_3^{\text{IV}}\text{O}_4(\text{im})_3[\text{Mo}^{\text{VI}}\text{O}_3(\text{Hcit})]_2\}\cdot 3\text{im}\cdot 4\text{H}_2\text{O}$  (**1**) and  $(\text{Him})_2\{\text{Mo}_3^{\text{IV}}\text{SO}_3(\text{im})_3[\text{Mo}^{\text{VI}}\text{O}_3(\text{Hcit})]_2\}\cdot\text{im}\cdot 6\text{H}_2\text{O}$  (**2**).

**Figure S29.** UV-vis spectrum of *trans*- $[(\text{Mo}^{\text{V}}\text{O})_2\text{O}(\text{H}_2\text{homocit})_2(\text{bpy})_2] 4\text{H}_2\text{O}$  (**3**).

**Figure S30.** Cyclic voltammogram of  $\text{K}_2\{\text{Mo}_3^{\text{IV}}\text{O}_4(\text{im})_3[\text{Mo}^{\text{VI}}\text{O}_3(\text{Hcit})]_2\}\cdot 3\text{im}\cdot 4\text{H}_2\text{O}$  (**1**) versus an  $\text{Hg}/\text{Hg}_2\text{Cl}_2$  reference electrode in 1 mol/L  $\text{Na}_2\text{SO}_4$  at a scan rate of 100  $\text{mV s}^{-1}$ .

**Figure S31.** Cyclic voltammogram of  $(\text{Him})_2\{\text{Mo}_3^{\text{IV}}\text{SO}_3(\text{im})_3[\text{Mo}^{\text{VI}}\text{O}_3(\text{Hcit})]_2\}\cdot\text{im}\cdot 6\text{H}_2\text{O}$  (**2**) versus an  $\text{Hg}/\text{Hg}_2\text{Cl}_2$  reference electrode in 1 mol/L  $\text{Na}_2\text{SO}_4$  at a scan rate of 100  $\text{mV s}^{-1}$ .

**Figure S32.** Cyclic voltammogram of  $(\text{Et}_4\text{N})[\text{Mo}^{\text{VI}}\text{O}_2\text{Cl}(\text{H}_2\text{cit})]\cdot\text{H}_2\text{O}$  (**4**) versus an  $\text{Hg}/\text{Hg}_2\text{Cl}_2$  reference electrode in 1 mol/L  $\text{Na}_2\text{SO}_4$  at a scan rate of 100  $\text{mV s}^{-1}$ .

**Figure S33.** Mass spectrum of  $[\text{Mo}^{\text{IV}}\text{O}_2(\text{Hcit})]^{-1}$  in  $(\text{Et}_4\text{N})[\text{Mo}^{\text{VI}}\text{O}_2\text{Cl}(\text{H}_2\text{cit})]\cdot\text{H}_2\text{O}$  (**3**).

**Table S1.** Selected bond distances ( $\text{\AA}$ ) and angles ( $^\circ$ ) within the water layers in  $\text{K}_2\{\text{Mo}_3^{\text{IV}}\text{O}_4(\text{im})_3[\text{Mo}^{\text{VI}}\text{O}_3(\text{Hcit})]_2\}\cdot 3\text{im}\cdot 4\text{H}_2\text{O}$  (**1**).

**Table S2.** Selected bond distances ( $\text{\AA}$ ) and angles ( $^\circ$ ) within the water layers in  $(\text{Him})_2\{\text{Mo}_3^{\text{IV}}\text{SO}_3(\text{im})_3[\text{Mo}^{\text{VI}}\text{O}_3(\text{Hcit})]_2\}\cdot\text{im}\cdot 6\text{H}_2\text{O}$  (**2**).

**Table S3.** Selected bond distances ( $\text{\AA}$ ) and angles ( $^\circ$ ) within the water layers in  $(\text{Et}_4\text{N})[\text{Mo}^{\text{VI}}\text{O}_2\text{Cl}(\text{H}_2\text{cit})]\cdot\text{H}_2\text{O}$  (**4**).

**Table S4.** Comparisons of selected bond distances ( $\text{\AA}$ ) for  $\text{K}_2\{\text{Mo}_3^{\text{IV}}\text{O}_4(\text{im})_3[\text{Mo}^{\text{VI}}\text{O}_3(\text{Hcit})]_2\}\cdot 3\text{im}\cdot 4\text{H}_2\text{O}$  (**1**),  $(\text{Him})_2\{\text{Mo}_3^{\text{IV}}\text{SO}_3(\text{im})_3[\text{Mo}^{\text{VI}}\text{O}_3(\text{Hcit})]_2\}\cdot\text{im}\cdot 6\text{H}_2\text{O}$  (**2**), *trans*- $[(\text{Mo}^{\text{V}}\text{O})_2\text{O}(\text{H}_2\text{homocit})_2(\text{bpy})_2] 4\text{H}_2\text{O}$  (**3**),  $[(\text{Mo}^{\text{V}}\text{O})_2\text{O}(\text{H}_2\text{cit})_2(\text{bpy})_2] 4\text{H}_2\text{O}$  (**5**),<sup>1</sup>  $[\text{Mo}_3^{\text{IV}}\text{SO}_3(\text{glyc})_2(\text{im})_5]\cdot\text{im}\cdot\text{H}_2\text{O}$  (**13**),<sup>2</sup>  $\text{Na}_2[\text{Mo}_3^{\text{IV}}\text{SO}_3(\text{R},\text{S-lact})_3(\text{im})_3]\cdot 10\text{H}_2\text{O}$  (**14**),<sup>2</sup>  $[\text{Mo}_3^{\text{IV}}\text{S}_4(\text{PPh}_3)_3(\text{Hlact})_2(\text{lact})]$  (**15**),<sup>3</sup>  $\text{Mo}_3^{\text{V/VI}}\text{O}_8(\text{im})_4\text{H}_2\text{O}$  (**18**),<sup>4</sup>  $\text{Mo}_3^{\text{V/VI}}\text{O}_8(\text{im})_4\text{H}_2\text{O}$  (**19**),<sup>4</sup>  $\text{Mo}_2^{\text{VI}}\text{O}_6(\text{im})_4$  (**20**),<sup>5</sup> *cis*- $\text{Na}_2[\text{Mo}_2^{\text{V}}\text{O}_4(\text{ox})_2(\text{im})_2] 4.5\text{H}_2\text{O}$  (**21**),<sup>4</sup> *cis*- $\text{K}_2[\text{Mo}_2^{\text{V}}\text{O}_4(\text{ox})_2(\text{im})_2] 3\text{H}_2\text{O}$  (**22**),<sup>4</sup>  $\text{K}(\text{Him})[\text{Mo}_3^{\text{IV}}\text{O}_4(\text{ox})_3(\text{im})_3] 3\text{H}_2\text{O}$  (**23**),<sup>4</sup>  $(4\text{-MePyH})(\text{H}_3\text{O})[\text{Mo}_3^{\text{IV}}\text{O}_4(\text{C}_2\text{O}_4)_3(4\text{-MePy})_3] \text{H}_2\text{O}$  (**24**),<sup>6</sup>

$(\text{MeNC}_6\text{H}_7)(\text{H}_3\text{O})[\text{Mo}_3^{\text{IV}}\text{O}_4(\text{C}_2\text{O}_4)_3(4\text{-MePy})_3] \cdot 1/2(4\text{-MePy})$  (25),<sup>6</sup>  
 $\text{Na}_2[\text{Mo}_3^{\text{IV}}\text{O}_4((\text{O}_2\text{CCH}_2)_2\text{NCH}_3)_3] \cdot 7\text{H}_2\text{O}$  (26),<sup>7</sup>  $[\text{Mo}_3^{\text{IV}}\text{O}(\text{OH})_3(\text{Hnta})_3] \text{Cl} \cdot 3\text{H}_2\text{O}$  (27),<sup>8</sup>  
 $(\text{PyH})_4[\text{Mo}_4^{\text{V}}\text{O}_8\text{Cl}_4(\text{glyc})_2] \cdot 2\text{EtOH}$  (28),<sup>9</sup>  $[\text{Mo}_4^{\text{V}}\text{O}_8(\text{glyc})_2\text{Py}_4]$  (29),<sup>9</sup>  
 $\text{Na}_4[\text{Mo}_6^{\text{IV}}\text{O}_8(\text{EDTA})_3] \cdot 14\text{H}_2\text{O}$  (30),<sup>10</sup>  $[\text{Mo}_6^{\text{IV}}\text{O}_{10}(\text{bpy})_4(\text{Hnta})_2] \cdot 10\text{H}_2\text{O}$  (31),<sup>11</sup>  
 $[\text{Mo}_6^{\text{IV}}\text{O}_{10}(\text{R,S-lact})_2(\text{im})_{10}] \cdot 16\text{H}_2\text{O}$  (32),<sup>2</sup>  $[\text{Mo}_3^{\text{IV}}\text{SO}_3(\text{acac})_3(\text{py})_3] \text{PF}_6 \cdot 2\text{C}_6\text{H}_5\text{CH}_3$   
 (33)<sup>12</sup> and  $[\text{Mo}_3^{\text{IV}}\text{S}_4(\text{Clqn})_3(\text{H}_2\text{O})_3]^+$  (34)<sup>13</sup> ( $\text{HClqn} = \text{C}_9\text{H}_6\text{ClNO}$ ).

**Table S5.** <sup>13</sup>C NMR data of  $\text{K}_2\{\text{Mo}_3^{\text{IV}}\text{O}_4(\text{im})_3[\text{Mo}^{\text{VI}}\text{O}_3(\text{Hcit})]_2\} \cdot 3\text{im} \cdot 4\text{H}_2\text{O}$  (1),  
 $(\text{Him})_2\{\text{Mo}_3^{\text{IV}}\text{SO}_3(\text{im})_3[\text{Mo}^{\text{VI}}\text{O}_3(\text{Hcit})]_2\} \cdot \text{im} \cdot 6\text{H}_2\text{O}$  (2) and  
 $(\text{Et}_4\text{N})[\text{Mo}^{\text{VI}}\text{O}_2\text{Cl}(\text{H}_2\text{cit})] \cdot \text{H}_2\text{O}$  (4).

**Table S6.** Crystallographic data and structural refinements for  
 $\text{K}_2\{\text{Mo}_3^{\text{IV}}\text{O}_4(\text{im})_3[\text{Mo}^{\text{VI}}\text{O}_3(\text{Hcit})]_2\} \cdot 3\text{im} \cdot 4\text{H}_2\text{O}$  (1),  
 $(\text{Him})_2\{\text{Mo}_3^{\text{IV}}\text{SO}_3(\text{im})_3[\text{Mo}^{\text{VI}}\text{O}_3(\text{Hcit})]_2\} \cdot \text{im} \cdot 6\text{H}_2\text{O}$  (2),  
 $\text{trans}-[(\text{Mo}^{\text{V}}\text{O})_2\text{O}(\text{H}_2\text{homocit})_2(\text{bpy})_2] \cdot 4\text{H}_2\text{O}$  (3) and  $(\text{Et}_4\text{N})[\text{Mo}^{\text{VI}}\text{O}_2\text{Cl}(\text{H}_2\text{cit})] \cdot \text{H}_2\text{O}$   
 (4).

**Table S7.** Selected bond distances (Å) and angles (°) for  
 $\text{K}_2\{\text{Mo}_3^{\text{IV}}\text{O}_4(\text{im})_3[\text{Mo}^{\text{VI}}\text{O}_3(\text{Hcit})]_2\} \cdot 3\text{im} \cdot 4\text{H}_2\text{O}$  (1).

**Table S8.** Selected bond distances (Å) and angles (°) for  
 $(\text{Him})_2\{\text{Mo}_3^{\text{IV}}\text{SO}_3(\text{im})_3[\text{Mo}^{\text{VI}}\text{O}_3(\text{Hcit})]_2\} \cdot \text{im} \cdot 6\text{H}_2\text{O}$  (2).

**Table S9.** Selected bond distances (Å) and angles (°) for  
 $\text{trans}-[(\text{Mo}^{\text{V}}\text{O})_2\text{O}(\text{H}_2\text{homocit})_2(\text{bpy})_2] \cdot 4\text{H}_2\text{O}$  (3).

**Table S10.** Selected bond distances (Å) and angles (°) for  
 $(\text{Et}_4\text{N})[\text{Mo}^{\text{VI}}\text{O}_2\text{Cl}(\text{H}_2\text{cit})] \cdot \text{H}_2\text{O}$  (4).

**Figure S1.** Perspective view of the anion structure of  $\text{K}_2\{\text{Mo}_3^{\text{IV}}\text{O}_4(\text{im})_3[\text{Mo}^{\text{VI}}\text{O}_3(\text{Hcit})]_2\} \cdot 3\text{im} \cdot 4\text{H}_2\text{O}$  (**1**).

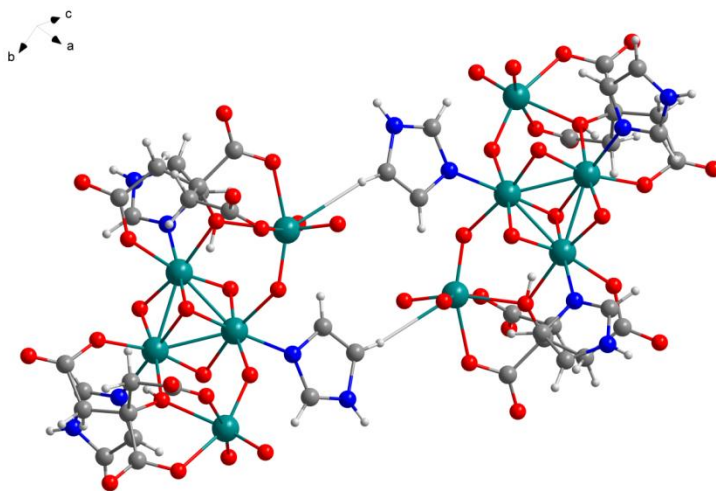

**Figure S2.** 2D layered structure of  $\text{K}_2\{\text{Mo}_3^{\text{IV}}\text{O}_4(\text{im})_3[\text{Mo}^{\text{VI}}\text{O}_3(\text{Hcit})]_2\} \cdot 3\text{im} \cdot 4\text{H}_2\text{O}$  (**1**).

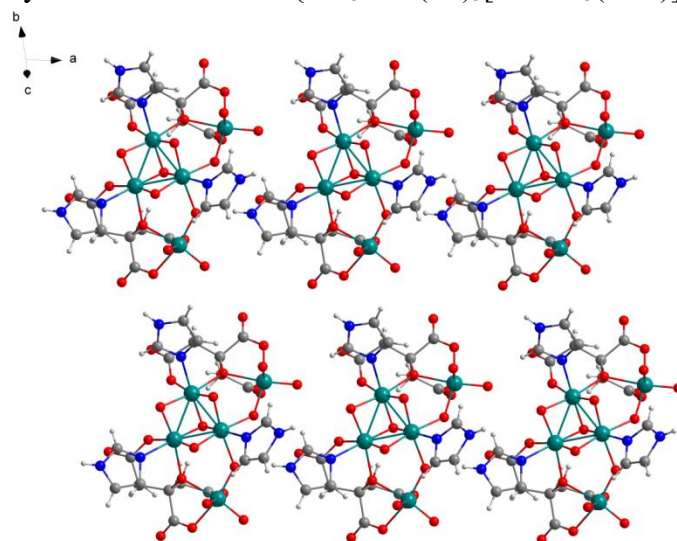

**Figure S3.** 2D layered structure of  $\text{K}_2\{\text{Mo}_3^{\text{IV}}\text{O}_4(\text{im})_3[\text{Mo}^{\text{VI}}\text{O}_3(\text{Hcit})]_2\} \cdot 3\text{im} \cdot 4\text{H}_2\text{O}$  (**1**) viewed along *a* axis.

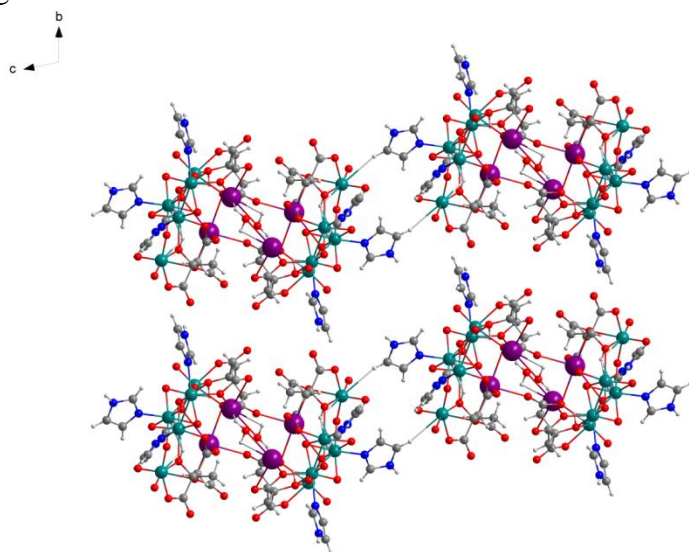

**Figure S4.** 2D layered structure of  $(\text{Him})_2\{\text{Mo}_3^{\text{IV}}\text{SO}_3(\text{im})_3[\text{Mo}^{\text{VI}}\text{O}_3(\text{Hcit})]_2\} \cdot \text{im} \cdot 6\text{H}_2\text{O}$  (**2**).

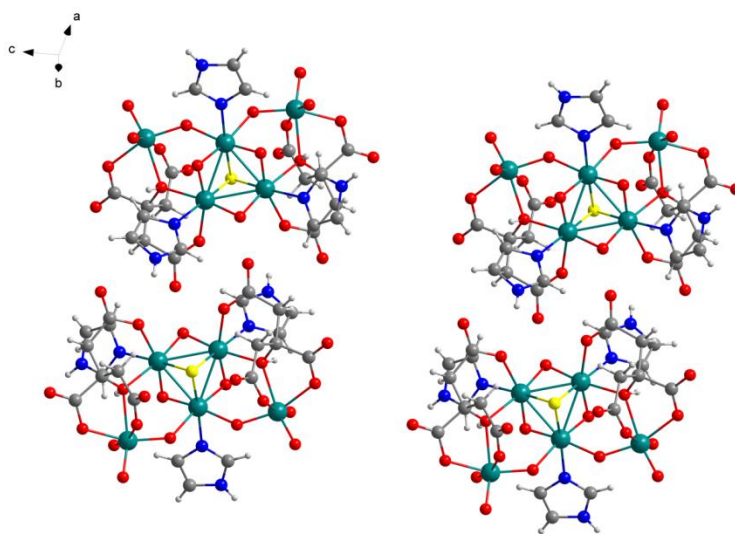

**Figure S5.** The 3D supramolecular are linked through hydrogen bonds in  $\text{K}_2\{\text{Mo}_3^{\text{IV}}\text{O}_4(\text{im})_3[\text{Mo}^{\text{VI}}\text{O}_3(\text{Hcit})_2]\} \cdot 3\text{im} \cdot 4\text{H}_2\text{O}$  (**1**) viewed along *a* axis.

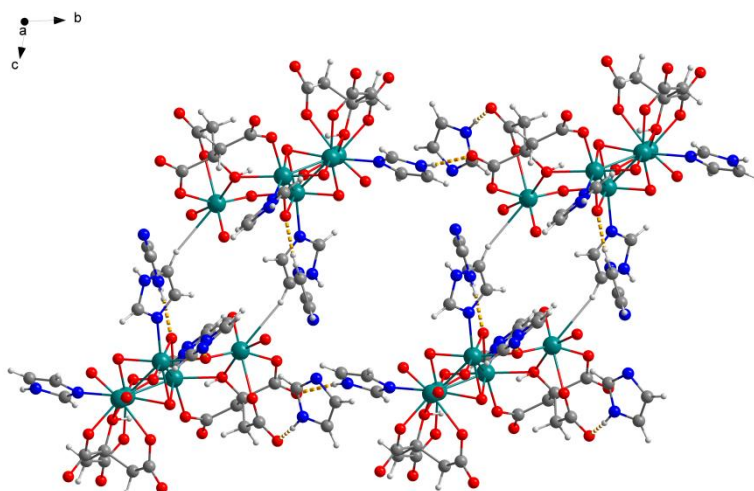

**Figure S6.** The 3D supramolecular are linked through hydrogen bonds in  $\text{K}_2\{\text{Mo}_3^{\text{IV}}\text{O}_4(\text{im})_3[\text{Mo}^{\text{VI}}\text{O}_3(\text{Hcit})_2]\} \cdot 3\text{im} \cdot 4\text{H}_2\text{O}$  (**1**) viewed along *b* axis.

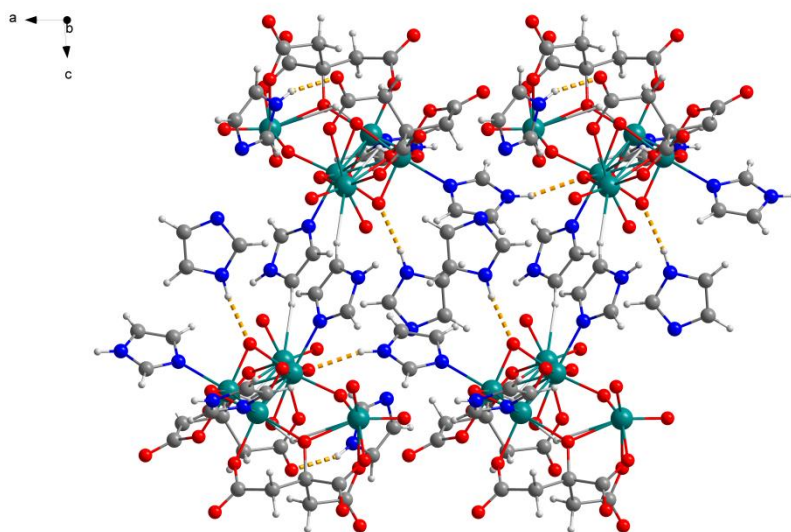

**Figure S7.** The 3D supramolecular are linked through hydrogen bonds in  $(\text{Him})_2\{\text{Mo}_3^{\text{IV}}\text{SO}_3(\text{im})_3[\text{Mo}^{\text{VI}}\text{O}_3(\text{Hcit})]_2\} \cdot \text{im} \cdot 6\text{H}_2\text{O}$  (**2**).

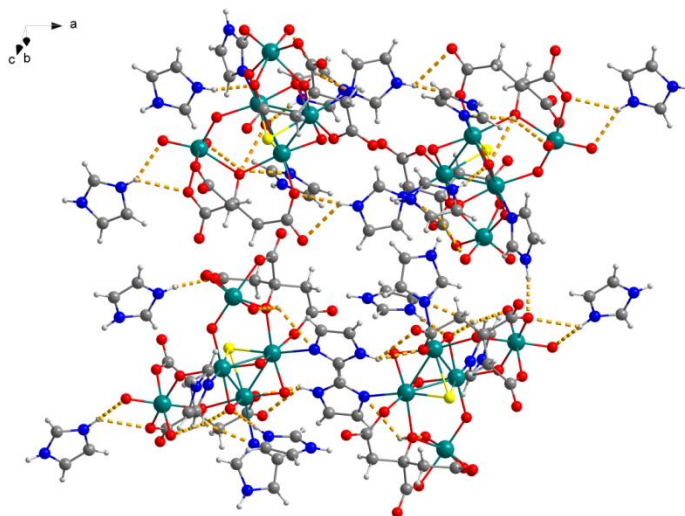

**Figure S8.** 3D water layers in  $(\text{Him})_2\{\text{Mo}_3^{\text{IV}}\text{SO}_3(\text{im})_3[\text{Mo}^{\text{VI}}\text{O}_3(\text{Hcit})]_2\} \cdot \text{im} \cdot 6\text{H}_2\text{O}$  (**2**).

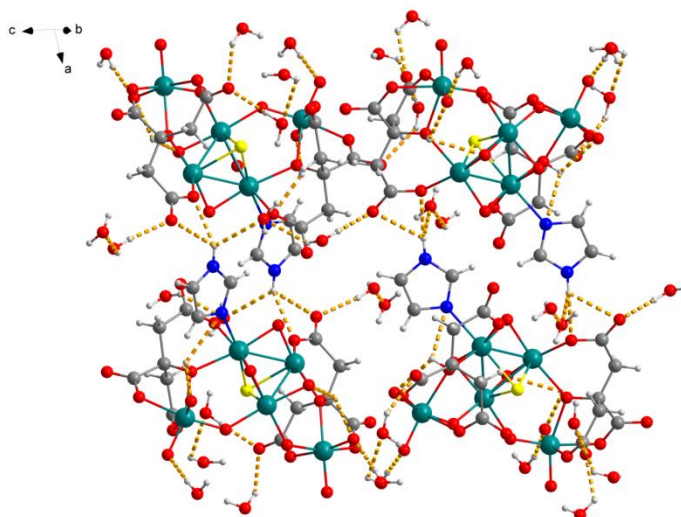



**Figure S9.** 2D layered structure of *trans*-[(Mo<sup>V</sup>O)<sub>2</sub>O(H<sub>2</sub>homocit)<sub>2</sub>(bpy)<sub>2</sub>] 4H<sub>2</sub>O (**3**).

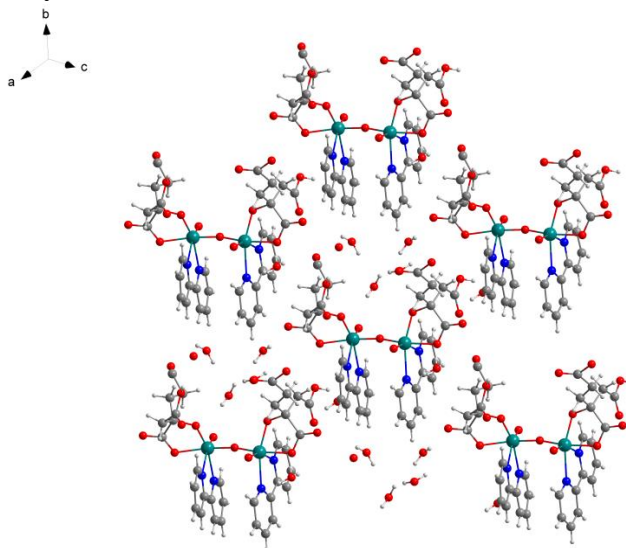

**Figure S10.** 2D layered structure of (Et<sub>4</sub>N)[Mo<sup>VI</sup>O<sub>2</sub>Cl(H<sub>2</sub>cit)]·H<sub>2</sub>O (**4**).

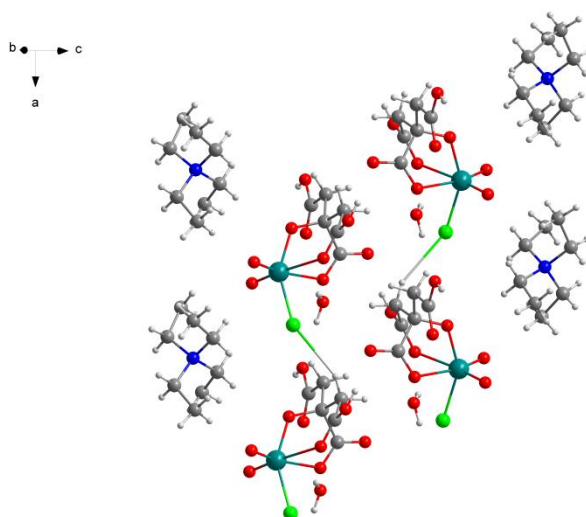



**Figure S11.** 2D water layers in  $(\text{Et}_4\text{N})[\text{Mo}^{\text{VI}}\text{O}_2\text{Cl}(\text{H}_2\text{cit})]\cdot\text{H}_2\text{O}$  (**4**).

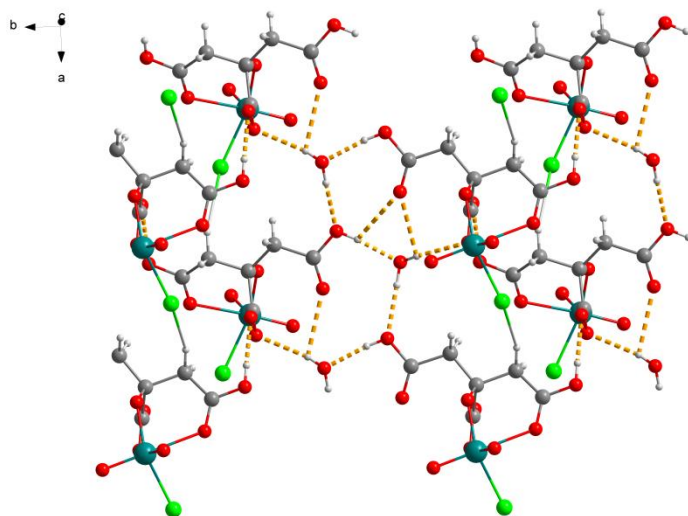

**Figure S12.**  $^1\text{H}$  NMR spectrum of  $\text{K}_2\{\text{Mo}_3^{\text{IV}}\text{O}_4(\text{im})_3[\text{Mo}^{\text{VI}}\text{O}_3(\text{Hcit})]_2\}\cdot 3\text{im}\cdot 4\text{H}_2\text{O}$  (**1**).

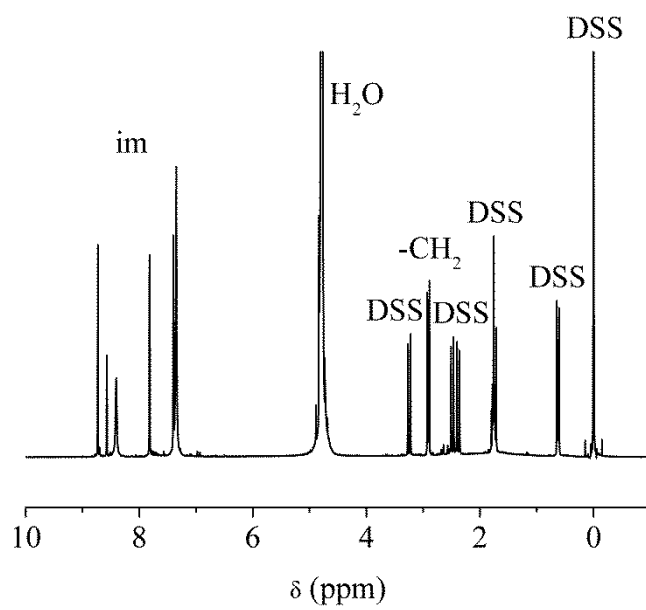

**Figure S13.**  $^1\text{H}$  NMR spectrum of  $(\text{Him})_2\{\text{Mo}_3^{\text{IV}}\text{SO}_3(\text{im})_3[\text{Mo}^{\text{VI}}\text{O}_3(\text{Hcit})_2]\}\cdot\text{im}\cdot 6\text{H}_2\text{O}$  (2).

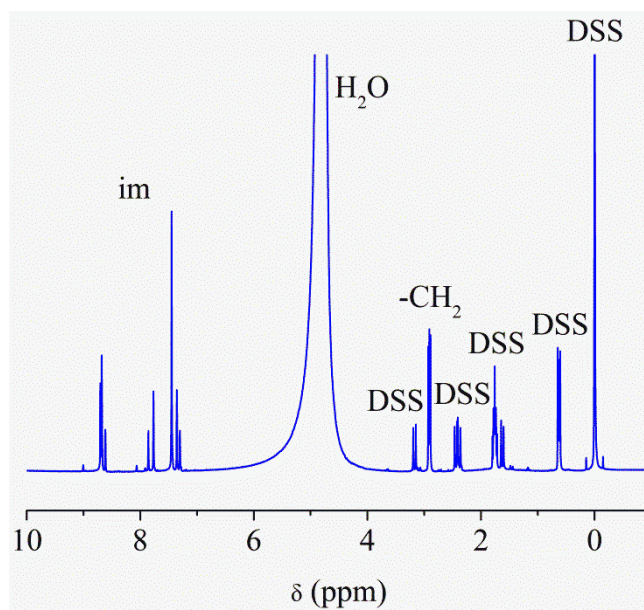

**Figure S14.**  $^{13}\text{C}$  NMR spectrum of  $(\text{Et}_4\text{N})[\text{Mo}^{\text{VI}}\text{O}_2\text{Cl}(\text{H}_2\text{cit})]\cdot\text{H}_2\text{O}$  (**4**).

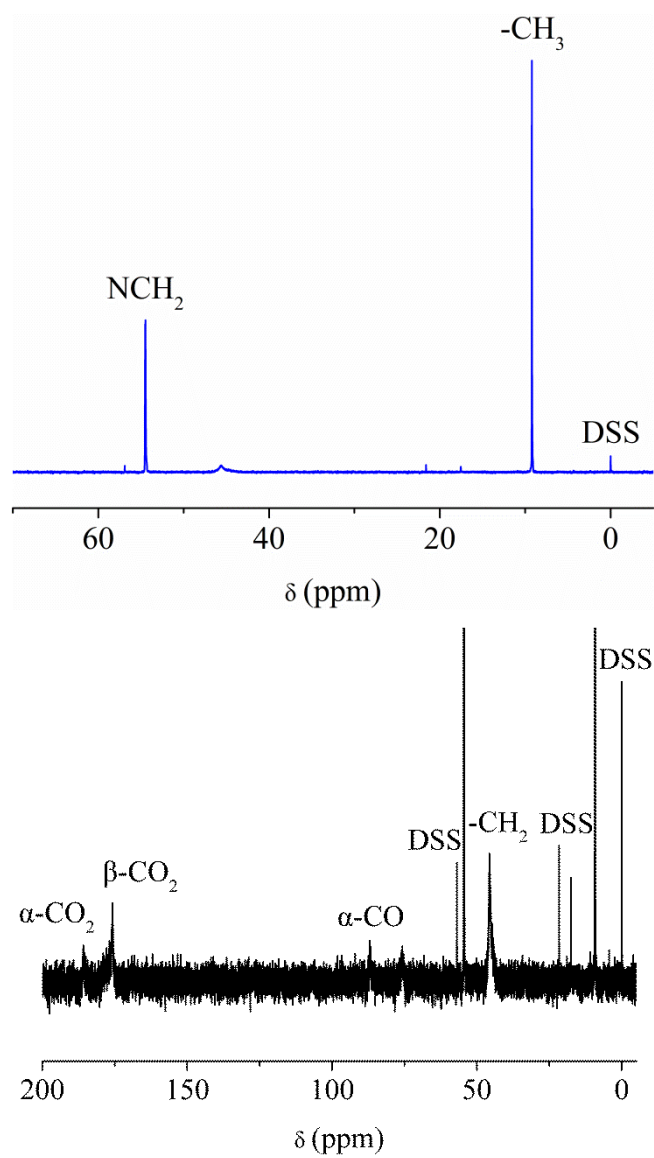

**Figure S15.**  $^1\text{H}$  NMR spectrum of  $(\text{Et}_4\text{N})[\text{Mo}^{\text{VI}}\text{O}_2\text{Cl}(\text{H}_2\text{cit})]\cdot\text{H}_2\text{O}$  (**4**).

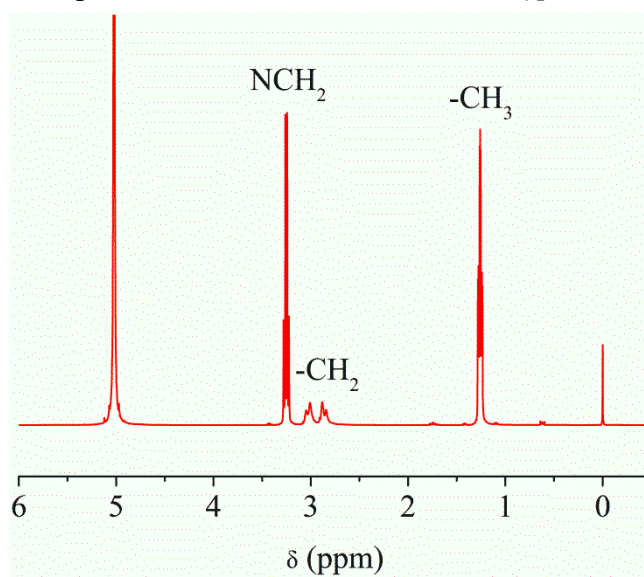

**Figure S16.**  $^{13}\text{C}$  NMR spectrum of  $\text{K}_2\{\text{Mo}_3^{\text{IV}}\text{O}_4(\text{im})_3[\text{Mo}^{\text{VI}}\text{O}_3(\text{Hcit})_2]\}\cdot 3\text{im}\cdot 4\text{H}_2\text{O}$  (**1**) after three months.

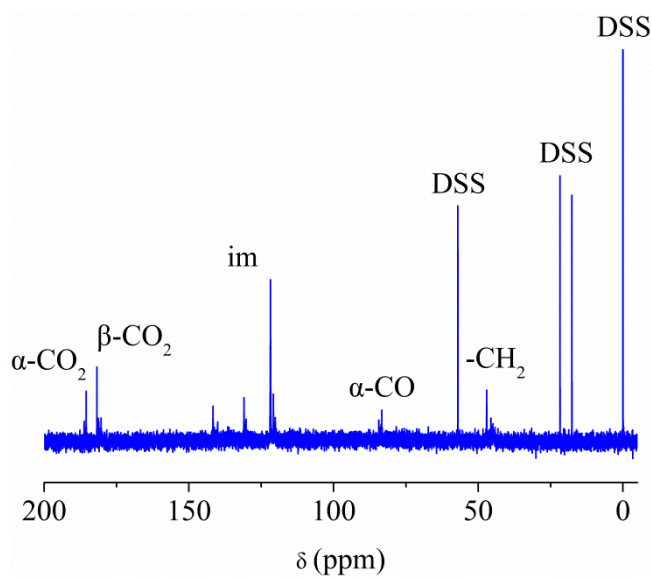

**Figure S17.**  $^1\text{H}$  NMR spectrum of  $\text{K}_2\{\text{Mo}_3^{\text{IV}}\text{O}_4(\text{im})_3[\text{Mo}^{\text{VI}}\text{O}_3(\text{Hcit})_2]\cdot 3\text{im}\cdot 4\text{H}_2\text{O}$  (**1**) after three months.

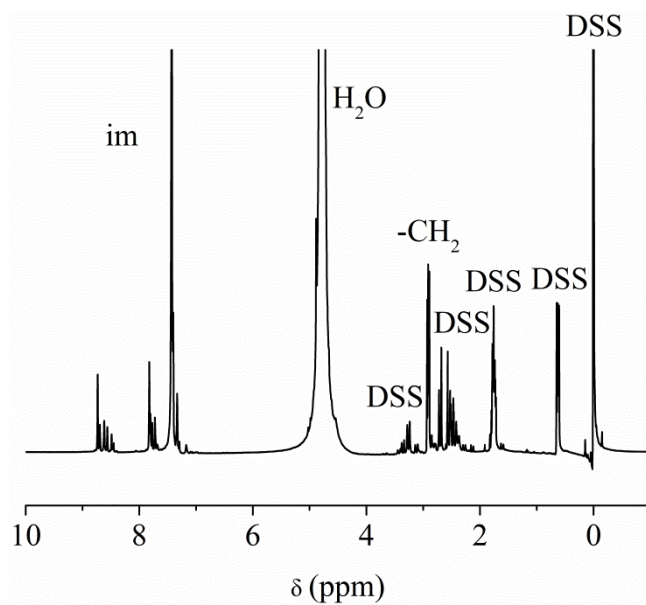

**Figure S18.**  $^{13}\text{C}$  NMR spectrum of  $(\text{Him})_2\{\text{Mo}_3^{\text{IV}}\text{SO}_3(\text{im})_3[\text{Mo}^{\text{VI}}\text{O}_3(\text{Hcit})_2]\cdot \text{im}\cdot 6\text{H}_2\text{O}$  (**2**) after three months.

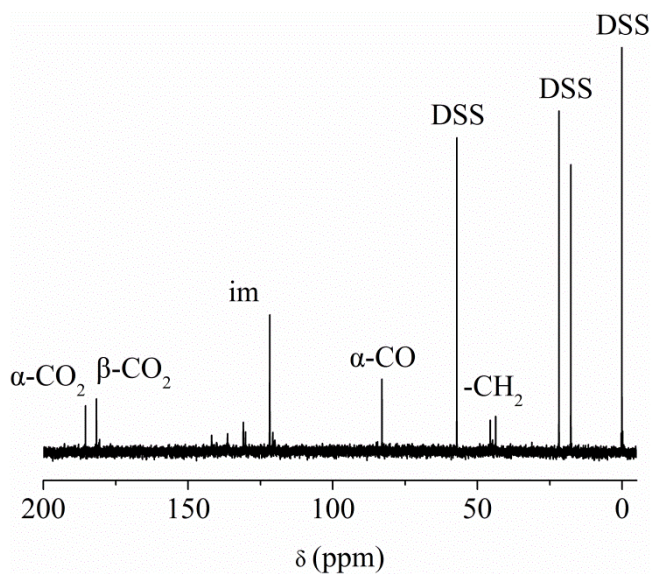

**Figure S19.**  $^1\text{H}$  NMR spectrum of  $(\text{Him})_2\{\text{Mo}_3^{\text{IV}}\text{SO}_3(\text{im})_3[\text{Mo}^{\text{VI}}\text{O}_3(\text{Hcit})_2]\}\cdot\text{im}\cdot 6\text{H}_2\text{O}$  (**2**) after three months.

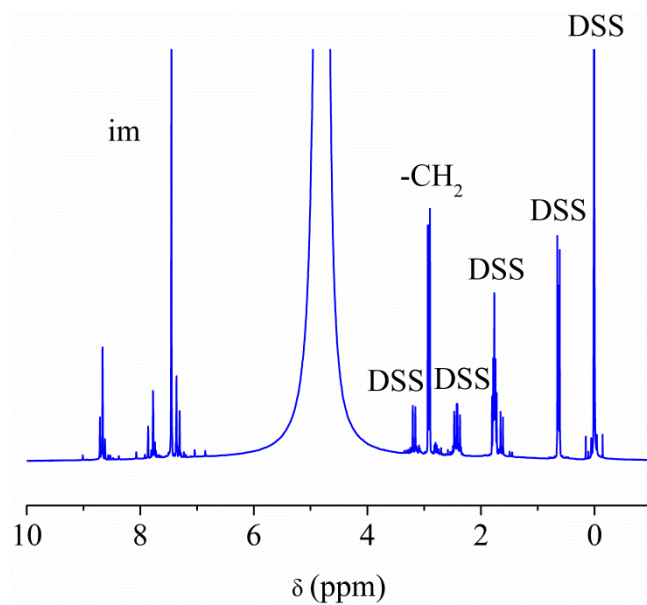

**Figure S20.**  $^{13}\text{C}$  NMR spectrum of  $(\text{Et}_4\text{N})[\text{Mo}^{\text{VI}}\text{O}_2\text{Cl}(\text{H}_2\text{cit})]\cdot\text{H}_2\text{O}$  (**4**) after three months.

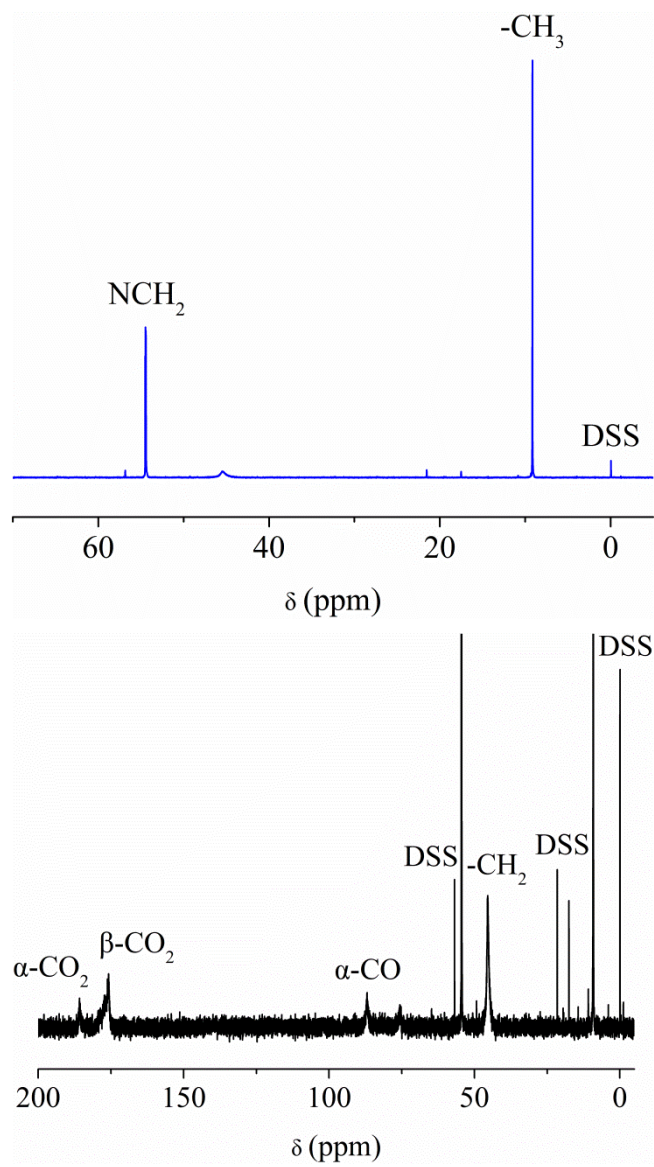



**Figure S21.**  $^1\text{H}$  NMR spectrum of  $(\text{Et}_4\text{N})[\text{Mo}^{\text{VI}}\text{O}_2\text{Cl}(\text{H}_2\text{cit})]\cdot\text{H}_2\text{O}$  (**4**) after three months.

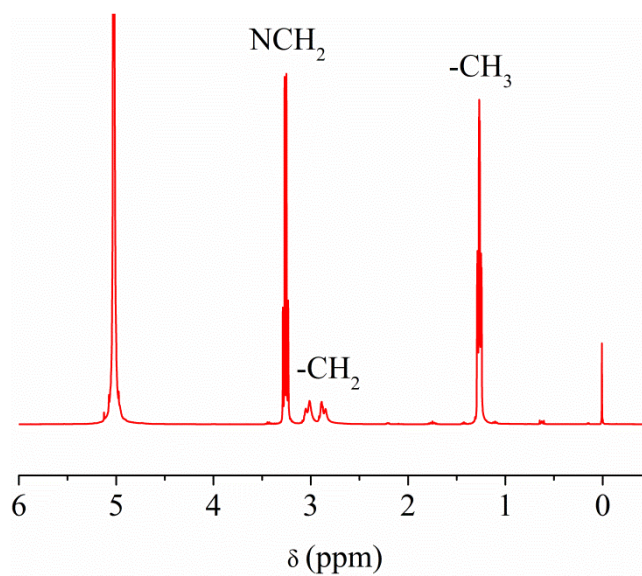

**Figure S22.** XPS spectrum of  $(\text{Him})_2\{\text{Mo}_3^{\text{IV}}\text{SO}_3(\text{im})_3[\text{Mo}^{\text{VI}}\text{O}_3(\text{Hcit})]_2\}\cdot\text{im}\cdot 6\text{H}_2\text{O}$  (**2**).

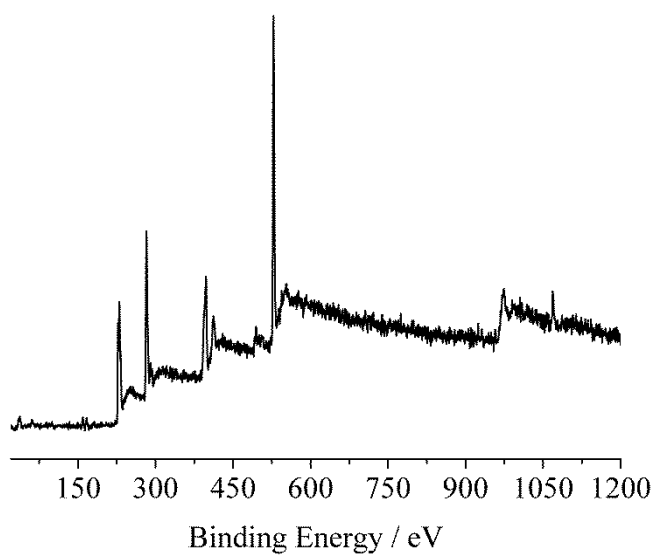

**Figure S23.** Plots of the experimental temperature dependence of  $\chi_M^{-1}$  and  $\chi_M T$  for  $(\text{Him})_2\{\text{Mo}_3^{\text{IV}}\text{SO}_3(\text{im})_3[\text{Mo}^{\text{VI}}\text{O}_3(\text{Hcit})_2]\} \cdot \text{im} \cdot 6\text{H}_2\text{O}$  (**2**).

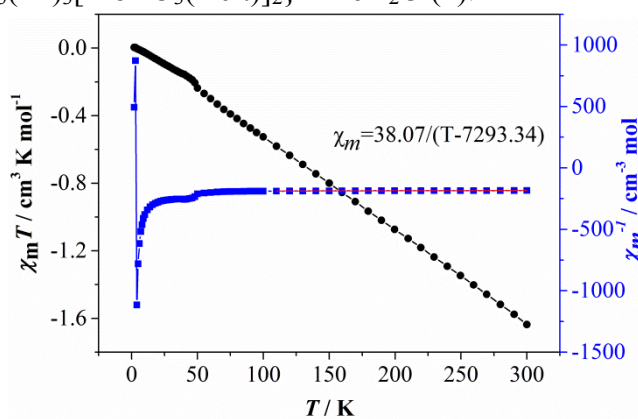

**Figure S24.** Plots of the experimental temperature dependence of  $\chi_M^{-1}$  and  $\chi_M T$  for  $\text{trans} - [(\text{Mo}^{\text{V}}\text{O})_2\text{O}(\text{H}_2\text{homocit})_2(\text{bpy})_2] \cdot 4\text{H}_2\text{O}$  (**3**).

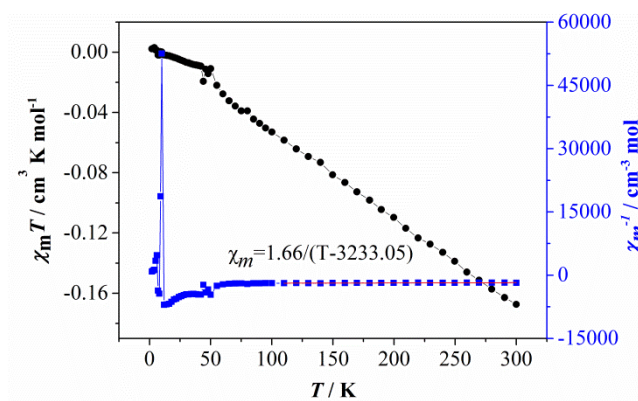

**Figure S25.** IR spectra of  $\text{K}_2\{\text{Mo}_3^{\text{IV}}\text{O}_4(\text{im})_3[\text{Mo}^{\text{VI}}\text{O}_3(\text{Hcit})]_2\} \cdot 3\text{im} \cdot 4\text{H}_2\text{O}$  (**1**) and  $(\text{Him})_2\{\text{Mo}_3^{\text{IV}}\text{SO}_3(\text{im})_3[\text{Mo}^{\text{VI}}\text{O}_3(\text{Hcit})]_2\} \cdot \text{im} \cdot 6\text{H}_2\text{O}$  (**2**).

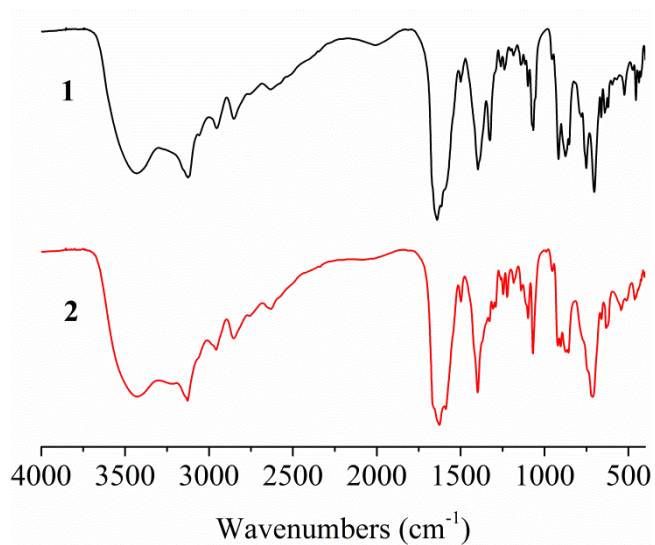

**Figure S26.** IR spectrum of *trans*- $[(\text{Mo}^{\text{V}}\text{O})_2\text{O}(\text{H}_2\text{homocit})_2(\text{bpy})_2] \cdot 4\text{H}_2\text{O}$  (**3**).

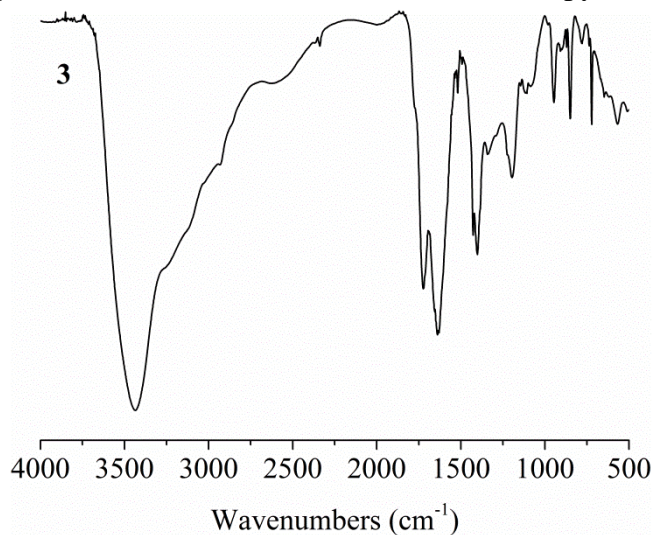

**Figure S27.** IR spectrum of  $(\text{Et}_4\text{N})[\text{Mo}^{\text{VI}}\text{O}_2\text{Cl}(\text{H}_2\text{cit})]\cdot\text{H}_2\text{O}$  (**4**).

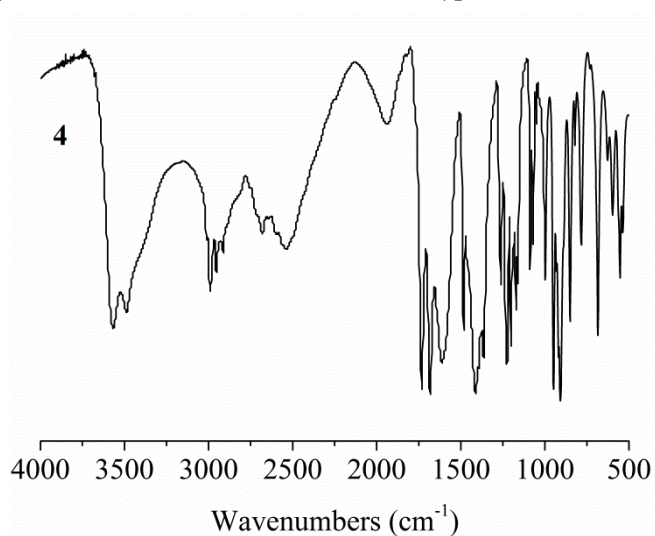

**Figure S28.** UV-vis spectra of  $\text{K}_2\{\text{Mo}_3^{\text{IV}}\text{O}_4(\text{im})_3[\text{Mo}^{\text{VI}}\text{O}_3(\text{Hcit})]_2\}\cdot 3\text{im}\cdot 4\text{H}_2\text{O}$  (**1**) and  $(\text{Him})_2\{\text{Mo}_3^{\text{IV}}\text{SO}_3(\text{im})_3[\text{Mo}^{\text{VI}}\text{O}_3(\text{Hcit})]_2\}\cdot \text{im}\cdot 6\text{H}_2\text{O}$  (**2**).

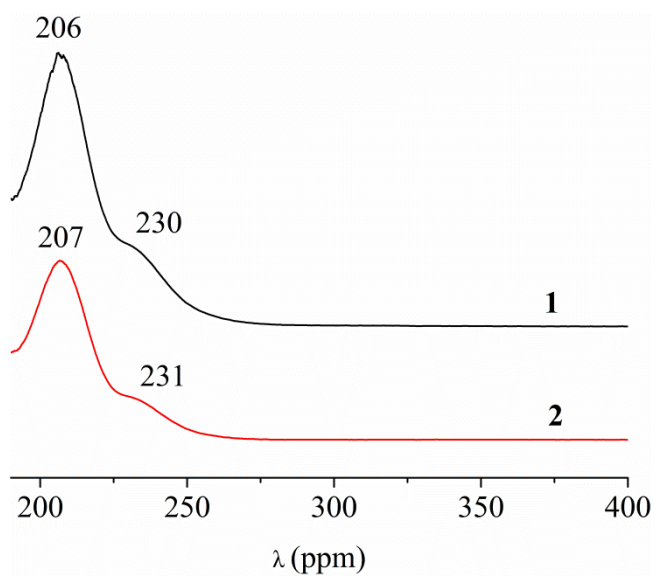

**Figure S29.** UV-vis spectrum of *trans*-[(Mo<sup>V</sup>O)<sub>2</sub>O(H<sub>2</sub>homocit)<sub>2</sub>(bpy)<sub>2</sub>] 4H<sub>2</sub>O (**3**).

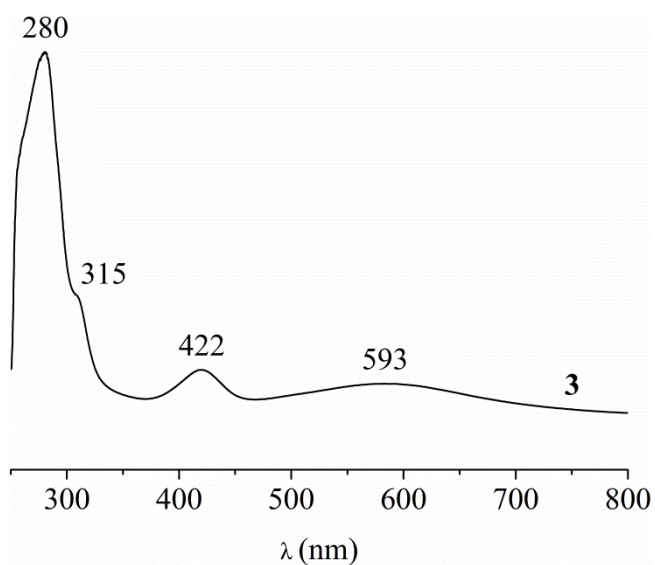

**Figure S30.** Cyclic voltammogram of  $\text{K}_2\{\text{Mo}_3^{\text{IV}}\text{O}_4(\text{im})_3[\text{Mo}^{\text{VI}}\text{O}_3(\text{Hcit})]_2\} \cdot 3\text{im} \cdot 4\text{H}_2\text{O}$  (**1**) versus an Hg/Hg<sub>2</sub>Cl<sub>2</sub> reference electrode in 1 mol/L Na<sub>2</sub>SO<sub>4</sub> at a scan rate of 100 mV s<sup>-1</sup>.

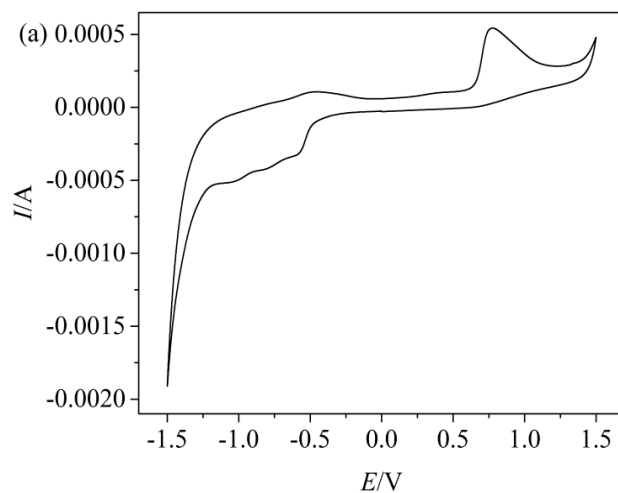

**Figure S31.** Cyclic voltammogram of  $(\text{Him})_2\{\text{Mo}_3^{\text{IV}}\text{SO}_3(\text{im})_3[\text{Mo}^{\text{VI}}\text{O}_3(\text{Hcit})]_2\}\cdot\text{im}\cdot 6\text{H}_2\text{O}$  (**2**) versus an  $\text{Hg}/\text{Hg}_2\text{Cl}_2$  reference electrode in 1 mol/L  $\text{Na}_2\text{SO}_4$  at a scan rate of  $100\text{ mV s}^{-1}$ .

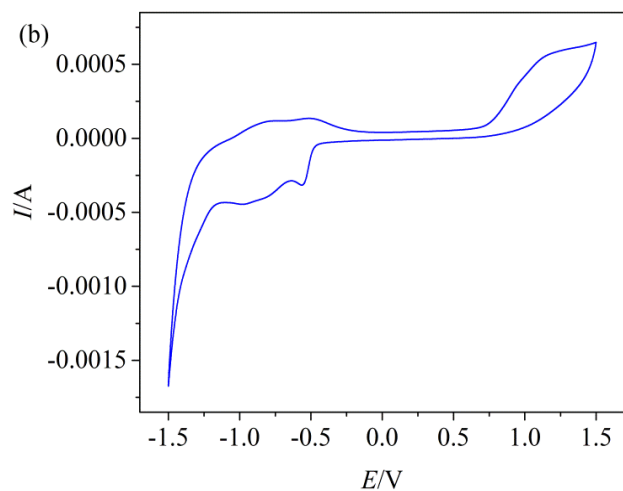

**Figure S32.** Cyclic voltammogram of  $(\text{Et}_4\text{N})[\text{Mo}^{\text{VI}}\text{O}_2\text{Cl}(\text{H}_2\text{cit})]\cdot\text{H}_2\text{O}$  (**4**) versus an  $\text{Hg}/\text{Hg}_2\text{Cl}_2$  reference electrode in 1 mol/L  $\text{Na}_2\text{SO}_4$  at a scan rate of  $100\text{ mV s}^{-1}$ .

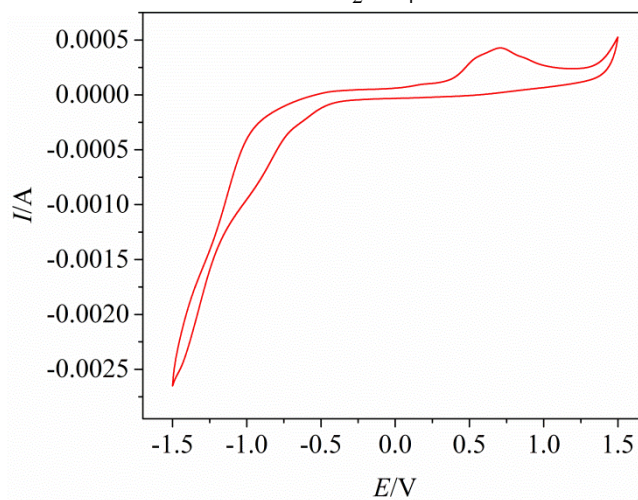

**Figure S33.** Mass spectrum of  $[\text{Mo}^{\text{IV}}\text{O}_2(\text{Hcit})]^{-1}$  in  $(\text{Et}_4\text{N})[\text{Mo}^{\text{VI}}\text{O}_2\text{Cl}(\text{H}_2\text{cit})]\cdot\text{H}_2\text{O}$  (**3**).

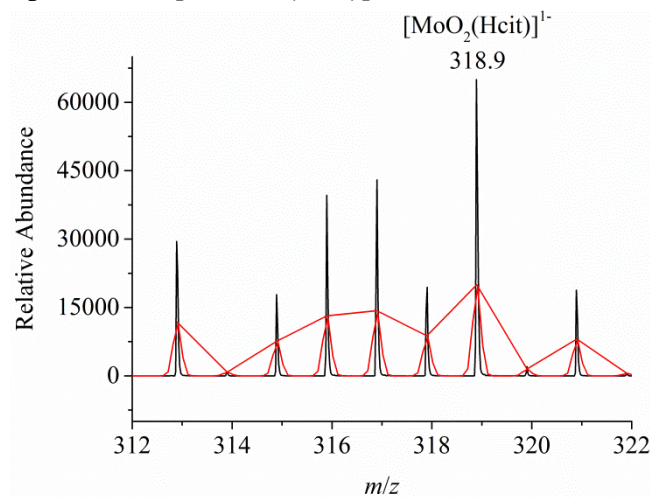



**Table S1.** Selected bond distances (Å) and angles (°) within the water layers in  $\text{K}_2\{\text{Mo}_3^{\text{IV}}\text{O}_4(\text{im})_3[\text{Mo}^{\text{VI}}\text{O}_3(\text{Hcit})_2]\}_2 \cdot 3\text{im} \cdot 4\text{H}_2\text{O}$  (**1**).

| D-H...A                                   | D-H(Å) | H...A(Å) | D...A(Å) | D-H...A(°) |
|-------------------------------------------|--------|----------|----------|------------|
| O <sub>1w</sub> -H ... O <sub>6d</sub>    | 0.79   | 2.26     | 3.01(1)  | 161        |
| O <sub>2w</sub> -H ... O <sub>5d</sub>    | 0.91   | 2.29     | 2.94(1)  | 128        |
| O <sub>2w</sub> -H ... O <sub>5d</sub>    | 0.93   | 2.56     | 2.94(1)  | 105        |
| O <sub>3w</sub> -H ... O <sub>12e</sub>   | 0.85   | 2.41     | 3.20(1)  | 154        |
| O <sub>3w</sub> -H ... O <sub>13e</sub>   | 0.85   | 2.23     | 2.87(1)  | 131        |
| O <sub>3w</sub> -H ... O <sub>2wa</sub>   | 0.87   | 1.25     | 1.89(2)  | 126        |
| O <sub>4wB</sub> -H ... O <sub>4wBf</sub> | 0.67   | 1.82     | 2.18(1)  | 114        |
| O <sub>4wB</sub> -H ... O <sub>4wBf</sub> | 0.80   | 1.66     | 2.177(1) | 121        |
| N <sub>4</sub> -H ... O <sub>10a</sub>    | 0.88   | 2.06     | 2.898(7) | 158        |
| N <sub>6</sub> -H ... O <sub>3b</sub>     | 0.88   | 2.03     | 2.874(8) | 160        |
| N <sub>8</sub> -H ... O <sub>5</sub>      | 0.88   | 1.90     | 2.732(9) | 157        |
| N <sub>10</sub> -H ... O <sub>22c</sub>   | 0.86   | 1.98     | 2.818(8) | 164        |

Symmetry codes: (a)  $-1 + x, y, z$ ; (b)  $x, 1 + y, z$ ; (c)  $1 - x, 1 - y, 2 - z$ ; (d)  $1 - x, 1 - y, 1 - z$ ; (e)  $1 - x, 2 - y, 1 - z$ ; (f)  $1 - x, 2 - y, 2 - z$

**Table S2.** Selected bond distances (Å) and angles (°) within the water layers in (Him)<sub>2</sub>{Mo<sub>3</sub><sup>IV</sup>SO<sub>3</sub>(im)<sub>3</sub>[Mo<sup>VI</sup>O<sub>3</sub>(Hcit)]<sub>2</sub>·im·6H<sub>2</sub>O (**2**).

| D-H···A                               | D-H(Å) | H···A(Å) | D···A(Å)  | D-H···A(°) |
|---------------------------------------|--------|----------|-----------|------------|
| O <sub>1w</sub> -H··O <sub>2w</sub>   | 0.85   | 1.95     | 2.737(8)  | 154        |
| O <sub>1w</sub> -H··O <sub>17a</sub>  | 0.82   | 2.03     | 2.822(6)  | 164        |
| O <sub>2w</sub> -H··O <sub>3b</sub>   | 0.88   | 1.88     | 2.724(9)  | 159        |
| O <sub>2w</sub> -H··O <sub>6c</sub>   | 0.82   | 2.21     | 2.918(8)  | 145        |
| O <sub>3w</sub> -H··O <sub>9d</sub>   | 0.97   | 1.76     | 2.701(8)  | 161        |
| O <sub>3w</sub> -H··O <sub>4we</sub>  | 0.87   | 2.38     | 2.969(10) | 125        |
| O <sub>4w</sub> -H··O <sub>3f</sub>   | 0.83   | 2.48     | 2.880(6)  | 111        |
| O <sub>4w</sub> -H··O <sub>15g</sub>  | 0.84   | 1.93     | 2.767(7)  | 173        |
| O <sub>5wA</sub> -H··O <sub>9</sub>   | 0.85   | 1.93     | 2.719(10) | 154        |
| O <sub>5wA</sub> -H··O <sub>18e</sub> | 0.85   | 2.26     | 2.702(10) | 112        |
| O <sub>6w</sub> -H··N <sub>12</sub>   | 0.85   | 1.91     | 2.725(11) | 162        |
| O <sub>6w</sub> -H··O <sub>15h</sub>  | 0.85   | 2.05     | 2.530(8)  | 115        |
| N <sub>2</sub> -H··O <sub>12e</sub>   | 0.86   | 1.93     | 2.772(7)  | 166        |
| N <sub>4</sub> -H··O <sub>2w</sub>    | 0.86   | 2.55     | 3.116(10) | 125        |
| N <sub>4</sub> -H··O <sub>16c</sub>   | 0.86   | 2.27     | 3.019(8)  | 146        |
| N <sub>4</sub> -H··O <sub>17c</sub>   | 0.86   | 2.52     | 3.033(8)  | 119        |
| N <sub>6</sub> -H··O <sub>21d</sub>   | 0.86   | 2.09     | 2.934(7)  | 168        |
| N <sub>7</sub> -H··O <sub>23</sub>    | 0.85   | 1.93     | 2.766(6)  | 164        |
| N <sub>8</sub> -H··O <sub>1w</sub>    | 0.86   | 1.86     | 2.720(8)  | 176        |
| N <sub>9</sub> -H··O <sub>4</sub>     | 0.85   | 1.87     | 2.719(6)  | 174        |
| N <sub>10</sub> -H··O <sub>19i</sub>  | 0.89   | 2.15     | 2.928(9)  | 146        |

Symmetry codes: (a)  $1 - x, \frac{1}{2} + y, \frac{1}{2} - z$ ; (b)  $1 - x, \frac{1}{2} + y, \frac{1}{2} - z$ ; (c)  $1 - x, 1 - y, 1 - z$ ; (d)  $x, \frac{1}{2} - y, -\frac{1}{2} + z$ ; (e)  $x, \frac{1}{2} - y, \frac{1}{2} + z$ ; (f)  $x, y, -1 + z$ ; (g)  $x, \frac{1}{2} - y, -\frac{1}{2} + z$ ; (h)  $2 - x, \frac{1}{2} + y, \frac{1}{2} - z$ ; (i)  $2 - x, 1 - y, 1 - z$

**Table S3.** Selected bond distances (Å) and angles (°) within the water layers in (Et<sub>4</sub>N)[Mo<sup>VI</sup>O<sub>2</sub>Cl(H<sub>2</sub>cit)]·H<sub>2</sub>O (**4**).

| D-H...A                              | D-H(Å) | H...A(Å) | D...A(Å) | D-H...A(°) |
|--------------------------------------|--------|----------|----------|------------|
| O <sub>1w</sub> -H...O <sub>2a</sub> | 0.85   | 2.16     | 2.981(6) | 164        |
| O <sub>1w</sub> -H...O <sub>6a</sub> | 0.85   | 2.56     | 2.912(6) | 106        |
| O <sub>1w</sub> -H...O <sub>7b</sub> | 0.85   | 1.97     | 2.823(6) | 178        |
| O <sub>5</sub> -H...O <sub>3c</sub>  | 0.82   | 1.78     | 2.594(6) | 172        |
| O <sub>7</sub> -H...O <sub>1w</sub>  | 0.82   | 1.77     | 2.585(6) | 173        |

Symmetry codes: (a)  $\frac{1}{2} + x, \frac{1}{2} - y, 1 - z$ ; (b)  $-\frac{1}{2} + x, \frac{1}{2} - y, 1 - z$ ; (c)  $\frac{1}{2} + x, \frac{1}{2} - y, 1 - z$

**Table S4.** Comparisons of selected bond distances ( Å ) for  $K_2\{Mo_3^{IV}O_4(im)_3[Mo^{VI}O_3(Hcit)]_2\} \cdot 3im \cdot 4H_2O$  (**1**),  $(Him)_2\{Mo_3^{IV}SO_3(im)_3[Mo^{VI}O_3(Hcit)]_2\} \cdot im \cdot 6H_2O$  (**2**), *trans*- $[(Mo^VO)_2O(H_2homocit)_2(bpy)_2] 4H_2O$  (**3**),  $[(Mo^VO)_2O(H_2cit)_2(bpy)_2] 4H_2O$  (**5**),<sup>1</sup>  $[Mo_3^{IV}SO_3(glyc)_2(im)_5] \cdot im \cdot H_2O$  (**13**),<sup>2</sup>  $Na_2[Mo_3^{IV}SO_3(R,S-lact)_3(im)_3] \cdot 10H_2O$  (**14**),<sup>2</sup>  $[Mo_3^{IV}S_4(PPh_3)_3(Hlact)_2(lact)]$  (**15**),<sup>3</sup>  $Mo_3^{V/VI}O_8(im)_4 im H_2O$  (**18**),<sup>4</sup>  $Mo_3^{V/VI}O_8(im)_4 H_2O$  (**19**),<sup>4</sup>  $Mo_2^{VI}O_6(im)_4$  (**20**),<sup>5</sup> *cis*- $Na_2[Mo_2^VO_4(ox)_2(im)_2] 4.5H_2O$  (**21**),<sup>4</sup> *cis*- $K_2[Mo_2^VO_4(ox)_2(im)_2] 3H_2O$  (**22**),<sup>4</sup>  $K(Him)[Mo_3^{IV}O_4(ox)_3(im)_3] 3H_2O$  (**23**),<sup>4</sup>  $(4-MePyH)(H_3O)[Mo_3^{IV}O_4(C_2O_4)_3(4-MePy)_3] H_2O$  (**24**),<sup>6</sup>  $(MeNC_6H_7)(H_3O)[Mo_3^{IV}O_4(C_2O_4)_3(4-MePy)_3] \cdot 1/2(4-MePy)$  (**25**),<sup>6</sup>  $Na_2[Mo_3^{IV}O_4((O_2CCH_2)_2NCH_3)_3] \cdot 7H_2O$  (**26**),<sup>7</sup>  $[Mo_3^{IV}O(OH)_3(Hnta)_3] Cl 3H_2O$  (**27**),<sup>8</sup>  $(PyH)_4[Mo_4^VO_8Cl_4(glyc)_2] 2EtOH$  (**28**),<sup>9</sup>  $[Mo_4^VO_8(glyc)_2Py_4]$  (**29**),<sup>9</sup>  $Na_4[Mo_6^{IV}O_8(EDTA)_3] \cdot 14H_2O$  (**30**),<sup>10</sup>  $[Mo_6^{IV}O_{10}(bpy)_4(Hnta)_2] \cdot 10H_2O$  (**31**),<sup>11</sup>  $[Mo_6^{IV}O_{10}(R,S-lact)_2(im)_{10}] \cdot 16H_2O$  (**32**),<sup>2</sup>  $[Mo_3^{IV}SO_3(acac)_3(py)_3] PF_6 \cdot 2C_6H_5CH_3$  (**33**)<sup>12</sup> and  $[Mo_3^{IV}S_4(Clqn)_3(H_2O)_3]^+$  (**34**)<sup>13</sup> ( $HClqn = C_9H_6ClNO$ ).

| Complexes <sup>a</sup><br>(Mo <sup>n+</sup> ) | Mo–N                   | Mo–μ <sub>2</sub> -O/S                                                                    | Mo–Mo                  | Mo–μ <sub>3</sub> -O/S |
|-----------------------------------------------|------------------------|-------------------------------------------------------------------------------------------|------------------------|------------------------|
| <b>1</b> (IV/VI)                              | 2.199(6) <sub>av</sub> | 1.922(4) <sub>av</sub> (IV)<br>2.045(4) <sub>av</sub> (IV)<br>1.838(4) <sub>av</sub> (VI) | 2.508(1) <sub>av</sub> | 2.042(4) <sub>av</sub> |
| <b>2</b> (IV/VI)                              | 2.199(5) <sub>av</sub> | 1.930(4) <sub>av</sub> (IV)<br>2.032(4) <sub>av</sub> (IV)<br>1.824(4) <sub>av</sub> (VI) | 2.593(1) <sub>av</sub> | 2.367(1) <sub>av</sub> |
| <b>3</b> (V)                                  | 2.273(2) <sub>av</sub> | 1.867(1) <sub>av</sub>                                                                    |                        |                        |
| <b>5</b> (V) <sup>1</sup>                     | 2.307(4) <sub>av</sub> | 1.882(3) <sub>av</sub>                                                                    |                        |                        |
| <b>18</b> (V/VI) <sup>4</sup>                 | 2.201(5) <sub>av</sub> | 1.947(4) <sub>av</sub>                                                                    | 2.573(1)               |                        |
| <b>19</b> (V/VI) <sup>4</sup>                 | 2.203(5) <sub>av</sub> | 1.952(4) <sub>av</sub>                                                                    | 2.573(1)               |                        |
| <b>20</b> (VI) <sup>5</sup>                   | 2.225(4) <sub>av</sub> | 1.940(3) <sub>av</sub>                                                                    |                        |                        |
| <b>21</b> (V) <sup>4</sup>                    | 2.186(3) <sub>av</sub> | 1.938(3) <sub>av</sub>                                                                    | 2.560(1)               |                        |
| <b>22</b> (V) <sup>4</sup>                    | 2.187(3) <sub>av</sub> | 1.940(3) <sub>av</sub>                                                                    | 2.548(1)               |                        |
| <b>23</b> (IV) <sup>4</sup>                   | 2.184(6) <sub>av</sub> | 1.910(4) <sub>av</sub>                                                                    | 2.494(1) <sub>av</sub> | 2.030(4) <sub>av</sub> |
| <b>24</b> (IV) <sup>6</sup>                   |                        | 1.914(3) <sub>av</sub>                                                                    | 2.499(5) <sub>av</sub> | 2.038(3) <sub>av</sub> |
| <b>25</b> (IV) <sup>6</sup>                   |                        | 1.927(2) <sub>av</sub>                                                                    | 2.503(3) <sub>av</sub> | 2.038(2) <sub>av</sub> |
| <b>26</b> (IV) <sup>7</sup>                   | 2.231(5) <sub>av</sub> | 1.918(4) <sub>av</sub>                                                                    | 2.495(1) <sub>av</sub> | 2.043(4) <sub>av</sub> |
| <b>27</b> (IV) <sup>8</sup>                   | 2.23(1) <sub>av</sub>  | 1.903(8) <sub>av</sub>                                                                    | 2.482(1) <sub>av</sub> | 2.046(8) <sub>av</sub> |
| <b>28</b> (V) <sup>9</sup>                    |                        | 1.935(3) <sub>av</sub>                                                                    | 2.612(1)               | 2.095(3) <sub>av</sub> |
| <b>29</b> (V) <sup>9</sup>                    | 2.226(4) <sub>av</sub> | 1.926(3) <sub>av</sub>                                                                    | 2.588(1)               | 2.085(3) <sub>av</sub> |
| <b>30</b> (IV) <sup>10</sup>                  | 2.274(9) <sub>av</sub> | 1.920(7) <sub>av</sub>                                                                    | 2.506(1) <sub>av</sub> | 2.042(7) <sub>av</sub> |
| <b>31</b> (IV) <sup>11</sup>                  | 2.227(4) <sub>av</sub> | 1.946(3) <sub>av</sub>                                                                    | 2.532(2) <sub>av</sub> | 2.050(3) <sub>av</sub> |
| <b>32</b> (IV) <sup>2</sup>                   | 2.206(6) <sub>av</sub> | 1.946(6) <sub>av</sub>                                                                    | 2.529(1) <sub>av</sub> | 2.047(4) <sub>av</sub> |
| <b>33</b> (IV) <sup>12</sup>                  | 2.246(6) <sub>av</sub> | 1.930(5) <sub>av</sub>                                                                    | 2.594(1) <sub>av</sub> | 2.364(2) <sub>av</sub> |
| <b>13</b> (IV) <sup>2</sup>                   | 2.223(3) <sub>av</sub> | 1.929(2) <sub>av</sub>                                                                    | 2.610(1) <sub>av</sub> | 2.360(1) <sub>av</sub> |

|                            |                        |                        |                        |                        |
|----------------------------|------------------------|------------------------|------------------------|------------------------|
| <b>14(IV)<sup>2</sup></b>  | 2.243(8) <sub>av</sub> | 1.936(6) <sub>av</sub> | 2.612(1) <sub>av</sub> | 2.369(2) <sub>av</sub> |
| <b>34(IV)<sup>13</sup></b> | 2.229(4) <sub>av</sub> | 2.301(1) <sub>av</sub> | 2.766(1) <sub>av</sub> | 2.345(1) <sub>av</sub> |
| <b>15(IV)<sup>3</sup></b>  |                        | 2.296(1) <sub>av</sub> | 2.761(1) <sub>av</sub> | 2.363(1) <sub>av</sub> |

---

**Table S5.**  $^{13}\text{C}$  NMR data of  $\text{K}_2\{\text{Mo}_3^{\text{IV}}\text{O}_4(\text{im})_3[\text{Mo}^{\text{VI}}\text{O}_3(\text{Hcit})]_2\}\cdot 3\text{im}\cdot 4\text{H}_2\text{O}$  (**1**),  $(\text{Him})_2\{\text{Mo}_3^{\text{IV}}\text{SO}_3(\text{im})_3[\text{Mo}^{\text{VI}}\text{O}_3(\text{Hcit})]_2\}\cdot \text{im}\cdot 6\text{H}_2\text{O}$  (**2**) and  $(\text{Et}_4\text{N})[\text{Mo}^{\text{VI}}\text{O}_2\text{Cl}(\text{H}_2\text{cit})]\cdot \text{H}_2\text{O}$  (**4**).

| Complex  | $\alpha$ -hydroxy/alkoxy | $\alpha$ -carboxy | $\beta$ -carboxy | methylene |
|----------|--------------------------|-------------------|------------------|-----------|
| <b>1</b> | 83.5                     | 185.5             | 181.3            | 45.2      |
| <b>2</b> | 82.9                     | 185.4             | 181.7            | 44.5      |
| <b>4</b> | 87.0                     | 185.8             | 175.8            | 45.6      |

**Table S6.** Crystallographic data and structural refinements for  $\text{K}_2\{\text{Mo}_3^{\text{IV}}\text{O}_4(\text{im})_3[\text{Mo}^{\text{VI}}\text{O}_3(\text{Hcit})]_2\} \cdot 3\text{im} \cdot 4\text{H}_2\text{O}$  (**1**),  $(\text{Him})_2\{\text{Mo}_3^{\text{IV}}\text{SO}_3(\text{im})_3[\text{Mo}^{\text{VI}}\text{O}_3(\text{Hcit})]_2\} \cdot \text{im} \cdot 6\text{H}_2\text{O}$  (**2**), *trans*- $[(\text{Mo}^{\text{V}}\text{O})_2\text{O}(\text{H}_2\text{homocit})_2(\text{bpy})_2] \cdot 4\text{H}_2\text{O}$  (**3**) and  $(\text{Et}_4\text{N})[\text{Mo}^{\text{VI}}\text{O}_2\text{Cl}(\text{H}_2\text{cit})] \cdot \text{H}_2\text{O}$  (**4**).

| Identification code                            | <b>1</b>                                                                    | <b>2</b>                                                                  |
|------------------------------------------------|-----------------------------------------------------------------------------|---------------------------------------------------------------------------|
| Empirical formula                              | $\text{C}_{30}\text{H}_{42}\text{K}_2\text{Mo}_5\text{N}_{12}\text{O}_{28}$ | $\text{C}_{30}\text{H}_{48}\text{Mo}_5\text{N}_{12}\text{O}_{29}\text{S}$ |
| Formula weight                                 | 1576.62                                                                     | 1552.53                                                                   |
| Temperature/K                                  | 173.0                                                                       | 173.0                                                                     |
| Crystal system                                 | triclinic                                                                   | monoclinic                                                                |
| Space group                                    | $P\bar{1}$                                                                  | $P2_1/c$                                                                  |
| $a/\text{\AA}$                                 | 9.7975(3)                                                                   | 21.9484(4)                                                                |
| $b/\text{\AA}$                                 | 13.8912(7)                                                                  | 15.2878(3)                                                                |
| $c/\text{\AA}$                                 | 18.5268(8)                                                                  | 15.5230(3)                                                                |
| $\alpha/^\circ$                                | 100.570(4)                                                                  | 90                                                                        |
| $\beta/^\circ$                                 | 94.254(3)                                                                   | 103.660(2)                                                                |
| $\gamma/^\circ$                                | 101.331(4)                                                                  | 90                                                                        |
| Volume/ $\text{\AA}^3$                         | 2414.4(2)                                                                   | 5061.3 (2)                                                                |
| $Z$                                            | 2                                                                           | 4                                                                         |
| $d_{\text{calc}} \text{ g/cm}^3$               | 2.163                                                                       | 2.030                                                                     |
| $\mu/\text{mm}^{-1}$                           | 12.849                                                                      | 11.190                                                                    |
| $F(000)$                                       | 1548.0                                                                      | 3056.0                                                                    |
| Crystal size/ $\text{mm}^3$                    | $0.24 \times 0.08 \times 0.04$                                              | $0.3 \times 0.2 \times 0.1$                                               |
| Radiation                                      | $\text{CuK}\alpha$ ( $\lambda = 1.54184$ )                                  | $\text{CuK}\alpha$ ( $\lambda = 1.54184$ )                                |
| 2 $\theta$ range for data collection/ $^\circ$ | 6.626 to 124.324                                                            | 7.114 to 124.368                                                          |
| Index ranges                                   | $-5 \leq h \leq 11,$<br>$-15 \leq k \leq 15,$<br>$-21 \leq l \leq 21$       | $-25 \leq h \leq 25,$<br>$-14 \leq k \leq 17,$<br>$-17 \leq l \leq 17$    |
| Reflections collected                          | 13938                                                                       | 16632                                                                     |



|                                                        | 7516                                                           | 7914                                                           |
|--------------------------------------------------------|----------------------------------------------------------------|----------------------------------------------------------------|
| Independent reflections                                | [ $R_{\text{int}} = 0.0337$ ,<br>$R_{\text{sigma}} = 0.0465$ ] | [ $R_{\text{int}} = 0.0331$ ,<br>$R_{\text{sigma}} = 0.0422$ ] |
| Data/restraints/parameters                             | 7516/55/685                                                    | 7914/23/679                                                    |
| Goodness-of-fit on $F^2$                               | 1.046                                                          | 1.052                                                          |
| Final $R$ indexes [ $I \geq 2\sigma$<br>( $I$ )]       | $R_1 = 0.0465$ ,<br>$wR_2 = 0.1276$                            | $R_1 = 0.0446$ ,<br>$wR_2 = 0.1137$                            |
| Final $R$ indexes [all data]                           | $R_1 = 0.0487$ ,<br>$wR_2 = 0.1299$                            | $R_1 = 0.0462$ ,<br>$wR_2 = 0.1153$                            |
| Largest diff. peak/hole /<br>$e \cdot \text{\AA}^{-3}$ | 2.99/-1.47                                                     | 2.76/-1.54                                                     |
| Flack parameter                                        |                                                                |                                                                |

| Identification code              | <b>3</b>                                                       | <b>4</b>                                              |
|----------------------------------|----------------------------------------------------------------|-------------------------------------------------------|
| Empirical formula                | $\text{C}_{34}\text{H}_{40}\text{Mo}_2\text{N}_4\text{O}_{21}$ | $\text{C}_{14}\text{H}_{28}\text{NO}_{10}\text{MoCl}$ |
| Formula weight                   | 1032.58                                                        | 501.77                                                |
| Temperature/K                    | 173                                                            | 173.0(1)                                              |
| Crystal system                   | triclinic                                                      | orthorhombic                                          |
| Space group                      | $P\bar{1}$                                                     | $P 2_1 2_1 2_1$                                       |
| $a/\text{\AA}$                   | 11.669 (2)                                                     | 7.6683(3)                                             |
| $b/\text{\AA}$                   | 13.252(1)                                                      | 12.0711(3)                                            |
| $c/\text{\AA}$                   | 15.392(2)                                                      | 22.2111(6)                                            |
| $\alpha/^\circ$                  | 97.117(9)                                                      | 90                                                    |
| $\beta/^\circ$                   | 104.18(1)                                                      | 90                                                    |
| $\gamma/^\circ$                  | 115.42(1)                                                      | 90                                                    |
| Volume/ $\text{\AA}^3$           | 2011.8(5)                                                      | 2056.0(1)                                             |
| $Z$                              | 2                                                              | 4                                                     |
| $d_{\text{calc}} \text{ g/cm}^3$ | 1.685                                                          | 1.621                                                 |
| $\mu/\text{mm}^{-1}$             | 5.900                                                          | 0.817                                                 |

|                                                        |                                                  |                                                  |
|--------------------------------------------------------|--------------------------------------------------|--------------------------------------------------|
| $F(000)$                                               | 1024.0                                           | 1032.0                                           |
| Crystal size/mm <sup>3</sup>                           | 0.1 × 0.1 × 0.01                                 | 0.4 × 0.1 × 0.08                                 |
| Radiation                                              | CuK $\alpha$ ( $\lambda = 1.54184$ )             | MoK $\alpha$ ( $\lambda = 0.71073$ )             |
| 2 $\theta$ range for data collection/°                 | 6.136 to 124.508                                 | 6.456 to 59.114                                  |
| Index ranges                                           | -13 ≤ h ≤ 13,<br>-10 ≤ k ≤ 15,<br>-17 ≤ l ≤ 17   | -10 ≤ h ≤ 7,<br>-16 ≤ k ≤ 13,<br>-30 ≤ l ≤ 11    |
| Reflections collected                                  | 11637<br>6264                                    | 6054<br>4183                                     |
| Independent reflections                                | [ $R_{int} = 0.0686$ ,<br>$R_{sigma} = 0.1034$ ] | [ $R_{int} = 0.0418$ ,<br>$R_{sigma} = 0.0868$ ] |
| Data/restraints/parameters                             | 6264/4/500                                       | 4183/0/253                                       |
| Goodness-of-fit on $F^2$                               | 1.037                                            | 1.059                                            |
| Final $R$ indexes [ $I \geq 2\sigma$ ( $I$ )]          | $R_1 = 0.0769$ ,<br>$wR_2 = 0.2138$              | $R_1 = 0.0505$ ,<br>$wR_2 = 0.0805$              |
| Final $R$ indexes [all data]                           | $R_1 = 0.1083$ ,<br>$wR_2 = 0.2387$              | $R_1 = 0.0618$ ,<br>$wR_2 = 0.0857$              |
| Largest diff. peak/hole /<br>$e \cdot \text{\AA}^{-3}$ | 2.44/-0.99                                       | 0.78/-0.70                                       |
| Flack parameter                                        |                                                  | 0.03(6)                                          |

**Table S7.** Selected bond distances (Å) and angles (°) for  $\text{K}_2\{\text{Mo}_3^{\text{IV}}\text{O}_4(\text{im})_3[\text{Mo}^{\text{VI}}\text{O}_3(\text{Hcit})]_2\} \cdot 3\text{im} \cdot 4\text{H}_2\text{O}$  (**1**).

|                   |           |                   |          |
|-------------------|-----------|-------------------|----------|
| Mo(1)–Mo(2)       | 2.5037(7) | Mo(3)–O(21)       | 2.047(4) |
| Mo(1)–Mo(3)       | 2.5010(6) | Mo(3)–O(23)       | 1.917(4) |
| Mo(1)–O(10)       | 2.063(4)  | Mo(3)–O(24)       | 1.907(4) |
| Mo(1)–O(20)       | 2.027(4)  | Mo(3)–N(5)        | 2.201(6) |
| Mo(1)–O(21)       | 2.046(4)  | Mo(4)–O(1)        | 2.185(4) |
| Mo(1)–O(22)       | 1.946(4)  | Mo(4)–O(2)        | 2.104(5) |
| Mo(1)–O(24)       | 1.934(4)  | Mo(4)–O(4)        | 2.266(4) |
| Mo(1)–N(1)        | 2.196(5)  | Mo(4)–O(8)        | 1.727(4) |
| Mo(2)–Mo(3)       | 2.5201(7) | Mo(4)–O(9)        | 1.707(5) |
| Mo(2)–O(1)        | 2.156(4)  | Mo(4)–O(10)       | 1.836(4) |
| Mo(2)–O(6)        | 2.080(5)  | Mo(5)–O(11)       | 2.198(4) |
| Mo(2)–O(21)       | 2.032(4)  | Mo(5)–O(12)       | 2.097(4) |
| Mo(2)–O(22)       | 1.913(4)  | Mo(5)–O(14)       | 2.251(5) |
| Mo(2)–O(23)       | 1.914(4)  | Mo(5)–O(18)       | 1.720(5) |
| Mo(2)–N(3)        | 2.199(6)  | Mo(5)–O(19)       | 1.718(5) |
| Mo(3)–O(11)       | 2.145(4)  | Mo(5)–O(20)       | 1.840(4) |
| Mo(3)–O(16)       | 2.062(4)  |                   |          |
| Mo(2)–Mo(1)–Mo(3) | 60.47(2)  | O(21)–Mo(3)–Mo(1) | 52.3(1)  |
| O(10)–Mo(1)–Mo(2) | 94.6(1)   | O(21)–Mo(3)–Mo(2) | 51.6(1)  |
| O(10)–Mo(1)–Mo(3) | 141.5(1)  | O(21)–Mo(3)–O(23) | 99.0(2)  |
| O(10)–Mo(1)–O(20) | 86.2(2)   | O(21)–Mo(3)–O(24) | 101.6(2) |
| O(10)–Mo(1)–O(21) | 89.3(2)   | O(21)–Mo(3)–N(5)  | 173.8(2) |
| O(10)–Mo(1)–O(22) | 88.4(2)   | O(23)–Mo(3)–Mo(1) | 96.1(1)  |
| O(10)–Mo(1)–O(24) | 169.4(2)  | O(23)–Mo(3)–Mo(2) | 48.8(1)  |
| O(10)–Mo(1)–N(1)  | 83.0(2)   | O(23)–Mo(3)–O(24) | 96.5(2)  |
| O(20)–Mo(1)–Mo(2) | 140.1(1)  | O(23)–Mo(3)–N(5)  | 85.2(2)  |
| O(20)–Mo(1)–Mo(3) | 95.4(1)   | O(24)–Mo(3)–Mo(1) | 49.8(1)  |
| O(20)–Mo(1)–O(21) | 88.3(2)   | O(24)–Mo(3)–Mo(2) | 94.4(1)  |
| O(20)–Mo(1)–O(22) | 169.8(2)  | O(24)–Mo(3)–N(5)  | 82.4(2)  |
| O(20)–Mo(1)–O(24) | 90.7(2)   | N(5)–Mo(3)–Mo(1)  | 132.1(2) |
| O(20)–Mo(1)–N(1)  | 85.7(2)   | N(5)–Mo(3)–Mo(2)  | 133.4(2) |
| O(21)–Mo(1)–Mo(2) | 51.9(1)   | O(1)–Mo(4)–O(2)   | 73.0(2)  |
| O(21)–Mo(1)–Mo(3) | 52.3(1)   | O(1)–Mo(4)–O(4)   | 78.4(2)  |
| O(21)–Mo(1)–O(22) | 100.3(2)  | O(1)–Mo(4)–O(8)   | 158.7(2) |
| O(21)–Mo(1)–O(24) | 100.7(2)  | O(1)–Mo(4)–O(9)   | 91.8(2)  |
| O(21)–Mo(1)–N(1)  | 170.6(2)  | O(1)–Mo(4)–O(10)  | 89.0(2)  |
| O(22)–Mo(1)–Mo(2) | 49.0(1)   | O(2)–Mo(4)–O(4)   | 77.8(2)  |
| O(22)–Mo(1)–Mo(3) | 94.2(1)   | O(2)–Mo(4)–O(8)   | 90.1(2)  |
| O(22)–Mo(1)–O(24) | 93.0(2)   | O(2)–Mo(4)–O(9)   | 92.7(2)  |
| O(22)–Mo(1)–N(1)  | 85.1(2)   | O(2)–Mo(4)–O(10)  | 156.2(2) |
| O(24)–Mo(1)–Mo(2) | 94.3(1)   | O(4)–Mo(4)–O(8)   | 85.6(2)  |

|                   |          |                   |          |
|-------------------|----------|-------------------|----------|
| O(24)–Mo(1)–Mo(3) | 48.9(1)  | O(4)–Mo(4)–O(9)   | 168.0(2) |
| O(24)–Mo(1)–N(1)  | 86.6(2)  | O(4)–Mo(4)–O(10)  | 83.4(2)  |
| N(1)–Mo(1)–Mo(2)  | 134.0(2) | O(8)–Mo(4)–O(9)   | 101.9(2) |
| N(1)–Mo(1)–Mo(3)  | 135.5(2) | O(8)–Mo(4)–O(10)  | 103.1(2) |
| Mo(1)–Mo(2)–Mo(3) | 59.71(2) | O(9)–Mo(4)–O(10)  | 103.6(2) |
| O(1)–Mo(2)–Mo(1)  | 94.3(1)  | O(11)–Mo(5)–O(12) | 73.3(2)  |
| O(1)–Mo(2)–Mo(3)  | 140.2(1) | O(11)–Mo(5)–O(14) | 77.3(2)  |
| O(1)–Mo(2)–O(6)   | 81.5(2)  | O(11)–Mo(5)–O(18) | 157.6(2) |
| O(1)–Mo(2)–O(21)  | 88.4(2)  | O(11)–Mo(5)–O(19) | 93.1(2)  |
| O(1)–Mo(2)–O(22)  | 88.7(2)  | O(11)–Mo(5)–O(20) | 88.4(2)  |
| O(1)–Mo(2)–O(23)  | 169.4(2) | O(12)–Mo(5)–O(14) | 78.4(2)  |
| O(1)–Mo(2)–N(3)   | 85.5(2)  | O(12)–Mo(5)–O(18) | 90.9(2)  |
| O(6)–Mo(2)–Mo(1)  | 140.1(1) | O(12)–Mo(5)–O(19) | 92.4(2)  |
| O(6)–Mo(2)–Mo(3)  | 99.5(1)  | O(12)–Mo(5)–O(20) | 157.1(2) |
| O(6)–Mo(2)–O(21)  | 87.8(2)  | O(14)–Mo(5)–O(18) | 84.2(2)  |
| O(6)–Mo(2)–O(22)  | 166.1(2) | O(14)–Mo(5)–O(19) | 168.2(2) |
| O(6)–Mo(2)–O(23)  | 91.9(2)  | O(14)–Mo(5)–O(20) | 84.4(2)  |
| O(6)–Mo(2)–N(3)   | 84.5(2)  | O(18)–Mo(5)–O(19) | 103.5(2) |
| O(21)–Mo(2)–Mo(1) | 52.4(1)  | O(18)–Mo(5)–O(20) | 102.2(2) |
| O(21)–Mo(2)–Mo(3) | 52.1(1)  | O(19)–Mo(5)–O(20) | 102.4(2) |
| O(21)–Mo(2)–O(22) | 101.9(2) | Mo(1)–O(21)–Mo(2) | 75.8(2)  |
| O(21)–Mo(2)–O(23) | 99.7(2)  | Mo(1)–O(22)–Mo(2) | 80.9(2)  |
| O(21)–Mo(2)–N(3)  | 170.8(2) | Mo(1)–O(21)–Mo(3) | 75.4(2)  |
| O(22)–Mo(2)–Mo(1) | 50.1(1)  | Mo(1)–O(24)–Mo(3) | 81.3(2)  |
| O(22)–Mo(2)–Mo(3) | 94.4(1)  | Mo(1)–O(10)–Mo(4) | 131.5(2) |
| O(22)–Mo(2)–O(23) | 96.3(2)  | Mo(1)–O(20)–Mo(5) | 131.6(2) |
| O(22)–Mo(2)–N(3)  | 84.9(2)  | Mo(2)–O(21)–Mo(3) | 76.3(2)  |
| O(23)–Mo(2)–Mo(1) | 96.1(1)  | Mo(2)–O(23)–Mo(3) | 82.3(2)  |
| O(23)–Mo(2)–Mo(3) | 48.9(1)  | Mo(2)–O(1)–Mo(4)  | 119.6(2) |
| O(23)–Mo(2)–N(3)  | 85.6(2)  | Mo(3)–O(11)–Mo(5) | 120.1(2) |
| N(3)–Mo(2)–Mo(1)  | 135.0(2) | C(1)–O(1)–Mo(2)   | 125.0(4) |
| N(3)–Mo(2)–Mo(3)  | 134.3(1) | C(1)–O(1)–Mo(4)   | 113.5(4) |
| Mo(1)–Mo(3)–Mo(2) | 59.82(2) | C(2)–O(2)–Mo(4)   | 120.7(4) |
| O(11)–Mo(3)–Mo(1) | 93.6(1)  | C(4)–O(4)–Mo(4)   | 133.2(4) |
| O(11)–Mo(3)–Mo(2) | 138.8(1) | C(6)–O(6)–Mo(2)   | 127.9(4) |
| O(11)–Mo(3)–O(16) | 82.0(2)  | C(7)–O(11)–Mo(3)  | 125.6(4) |
| O(11)–Mo(3)–O(21) | 87.5(2)  | C(7)–O(11)–Mo(5)  | 113.1(4) |
| O(11)–Mo(3)–O(23) | 170.3(2) | C(8)–O(12)–Mo(5)  | 120.4(4) |
| O(11)–Mo(3)–O(24) | 89.2(2)  | C(10)–O(14)–Mo(5) | 135.0(4) |
| O(11)–Mo(3)–N(5)  | 87.8(2)  | C(12)–O(16)–Mo(3) | 131.9(4) |
| O(16)–Mo(3)–Mo(1) | 141.6(1) | C(13)–N(1)–Mo(1)  | 128.8(5) |
| O(16)–Mo(3)–Mo(2) | 99.7(1)  | C(15)–N(1)–Mo(1)  | 124.8(5) |
| O(16)–Mo(3)–O(21) | 89.3(2)  | C(16)–N(3)–Mo(2)  | 125.7(5) |
| O(16)–Mo(3)–O(23) | 90.9(2)  | C(18)–N(3)–Mo(2)  | 127.0(4) |

---

|                   |          |                  |          |
|-------------------|----------|------------------|----------|
| O(16)–Mo(3)–O(24) | 165.7(2) | C(19)–N(5)–Mo(3) | 128.2(5) |
| O(16)–Mo(3)–N(5)  | 86.1(2)  | C(21)–N(5)–Mo(3) | 125.4(4) |

---

**Table S8.** Selected bond distances (Å) and angles (°) for (Him)<sub>2</sub>{Mo<sup>IV</sup>SO<sub>3</sub>(im)<sub>3</sub>[Mo<sup>VI</sup>O<sub>3</sub>(Hcit)]<sub>2</sub>·im·6H<sub>2</sub>O (**2**).

|                   |           |                   |          |
|-------------------|-----------|-------------------|----------|
| Mo(1)–Mo(2)       | 2.5831(6) | Mo(3)–O(22)       | 1.946(4) |
| Mo(1)–Mo(3)       | 2.5882(6) | Mo(3)–O(23)       | 1.898(4) |
| Mo(1)–O(10)       | 2.023(4)  | Mo(3)–N(5)        | 2.217(5) |
| Mo(1)–O(20)       | 2.041(4)  | Mo(3)–S(1)        | 2.363(1) |
| Mo(1)–O(21)       | 1.950(4)  | Mo(4)–O(1)        | 2.194(4) |
| Mo(1)–O(23)       | 1.936(4)  | Mo(4)–O(2)        | 2.103(4) |
| Mo(1)–N(1)        | 2.185(5)  | Mo(4)–O(4)        | 2.320(4) |
| Mo(1)–S(1)        | 2.371(1)  | Mo(4)–O(8)        | 1.708(4) |
| Mo(2)–Mo(3)       | 2.6066(6) | Mo(4)–O(9)        | 1.733(4) |
| Mo(2)–O(1)        | 2.187(4)  | Mo(4)–O(10)       | 1.825(4) |
| Mo(2)–O(6)        | 2.071(4)  | Mo(5)–O(11)       | 2.208(4) |
| Mo(2)–O(21)       | 1.898(4)  | Mo(5)–O(12)       | 2.104(4) |
| Mo(2)–O(22)       | 1.953(4)  | Mo(5)–O(14)       | 2.218(4) |
| Mo(2)–N(3)        | 2.195(5)  | Mo(5)–O(18)       | 1.717(4) |
| Mo(2)–S(1)        | 2.366(1)  | Mo(5)–O(19)       | 1.724(4) |
| Mo(3)–O(11)       | 2.191(4)  | Mo(5)–O(20)       | 1.823(4) |
| Mo(3)–O(16)       | 2.086(4)  |                   |          |
| Mo(2)–Mo(1)–Mo(3) | 60.54(2)  | O(22)–Mo(3)–Mo(1) | 96.0(1)  |
| O(10)–Mo(1)–Mo(2) | 95.3(1)   | O(22)–Mo(3)–Mo(2) | 48.2(1)  |
| O(10)–Mo(1)–Mo(3) | 145.5(1)  | O(22)–Mo(3)–O(23) | 96.0(2)  |
| O(10)–Mo(1)–O(20) | 91.3(2)   | O(22)–Mo(3)–N(5)  | 86.1(2)  |
| O(10)–Mo(1)–O(21) | 87.6(2)   | O(22)–Mo(3)–S(1)  | 102.2(1) |
| O(10)–Mo(1)–O(23) | 167.4(2)  | O(23)–Mo(3)–Mo(1) | 48.2(1)  |
| O(10)–Mo(1)–N(1)  | 86.1(2)   | O(23)–Mo(3)–Mo(2) | 92.1(1)  |
| O(10)–Mo(1)–S(1)  | 90.0(1)   | O(23)–Mo(3)–N(5)  | 80.4(2)  |
| O(20)–Mo(1)–Mo(2) | 144.6(1)  | O(23)–Mo(3)–S(1)  | 104.2(1) |
| O(20)–Mo(1)–Mo(3) | 96.1(1)   | N(5)–Mo(3)–Mo(1)  | 128.5(1) |
| O(20)–Mo(1)–O(21) | 168.4(2)  | N(5)–Mo(3)–Mo(2)  | 132.8(1) |
| O(20)–Mo(1)–O(23) | 88.8(2)   | N(5)–Mo(3)–S(1)   | 170.0(1) |
| O(20)–Mo(1)–N(1)  | 82.8(2)   | S(1)–Mo(3)–Mo(1)  | 56.99(3) |
| O(20)–Mo(1)–S(1)  | 88.5(1)   | S(1)–Mo(3)–Mo(2)  | 56.59(3) |
| O(21)–Mo(1)–Mo(2) | 47.0(1)   | O(1)–Mo(4)–O(2)   | 72.4(2)  |
| O(21)–Mo(1)–Mo(3) | 91.4(1)   | O(1)–Mo(4)–O(4)   | 76.0(1)  |
| O(21)–Mo(1)–O(23) | 89.8(2)   | O(1)–Mo(4)–O(8)   | 94.4(2)  |
| O(21)–Mo(1)–N(1)  | 85.6(2)   | O(1)–Mo(4)–O(9)   | 155.3(2) |
| O(21)–Mo(1)–S(1)  | 103.1(1)  | O(1)–Mo(4)–O(10)  | 89.8(2)  |
| O(23)–Mo(1)–Mo(2) | 92.0(1)   | O(2)–Mo(4)–O(4)   | 78.1(2)  |
| O(23)–Mo(1)–Mo(3) | 46.9(1)   | O(2)–Mo(4)–O(8)   | 93.8(2)  |
| O(23)–Mo(1)–N(1)  | 81.4(2)   | O(2)–Mo(4)–O(9)   | 90.4(2)  |
| O(23)–Mo(1)–S(1)  | 102.7(1)  | O(2)–Mo(4)–O(10)  | 156.5(2) |
| N(1)–Mo(1)–Mo(2)  | 132.3(1)  | O(4)–Mo(4)–O(8)   | 168.9(2) |

|                   |          |                   |          |
|-------------------|----------|-------------------|----------|
| N(1)–Mo(1)–Mo(3)  | 128.3(1) | O(4)–Mo(4)–O(9)   | 83.4(2)  |
| N(1)–Mo(1)–S(1)   | 170.3(1) | O(4)–Mo(4)–O(10)  | 82.9(2)  |
| S(1)–Mo(1)–Mo(2)  | 56.86(3) | O(8)–Mo(4)–O(9)   | 104.4(2) |
| S(1)–Mo(1)–Mo(3)  | 56.73(3) | O(8)–Mo(4)–O(10)  | 103.0(2) |
| Mo(1)–Mo(2)–Mo(3) | 59.83(2) | O(9)–Mo(4)–O(10)  | 101.0(2) |
| O(1)–Mo(2)–Mo(1)  | 92.0(1)  | O(11)–Mo(5)–O(12) | 72.8(1)  |
| O(1)–Mo(2)–Mo(3)  | 141.3(1) | O(11)–Mo(5)–O(14) | 77.5(2)  |
| O(1)–Mo(2)–O(6)   | 82.4(2)  | O(11)–Mo(5)–O(18) | 90.5(2)  |
| O(1)–Mo(2)–O(21)  | 86.6(2)  | O(11)–Mo(5)–O(19) | 157.1(2) |
| O(1)–Mo(2)–O(22)  | 170.7(2) | O(11)–Mo(5)–O(20) | 90.8(2)  |
| O(1)–Mo(2)–N(3)   | 85.0(2)  | O(12)–Mo(5)–O(14) | 77.7(2)  |
| O(1)–Mo(2)–S(1)   | 86.5(1)  | O(12)–Mo(5)–O(18) | 90.5(2)  |
| O(6)–Mo(2)–Mo(1)  | 145.3(1) | O(12)–Mo(5)–O(19) | 88.9(2)  |
| O(6)–Mo(2)–Mo(3)  | 105.4(1) | O(12)–Mo(5)–O(20) | 158.9(2) |
| O(6)–Mo(2)–O(21)  | 162.1(2) | O(14)–Mo(5)–O(18) | 165.1(2) |
| O(6)–Mo(2)–O(22)  | 93.7(2)  | O(14)–Mo(5)–O(19) | 85.2(2)  |
| O(6)–Mo(2)–N(3)   | 83.0(2)  | O(14)–Mo(5)–O(20) | 85.9(2)  |
| O(6)–Mo(2)–S(1)   | 88.4(1)  | O(18)–Mo(5)–O(19) | 103.8(2) |
| O(21)–Mo(2)–Mo(1) | 48.7(1)  | O(18)–Mo(5)–O(20) | 103.2(2) |
| O(21)–Mo(2)–Mo(3) | 92.0(1)  | O(19)–Mo(5)–O(20) | 103.0(2) |
| O(21)–Mo(2)–O(22) | 95.1(2)  | Mo(1)–O(21)–Mo(2) | 84.3(1)  |
| O(21)–Mo(2)–N(3)  | 82.1(2)  | Mo(1)–S(1)–Mo(2)  | 66.11(4) |
| O(21)–Mo(2)–S(1)  | 104.9(1) | Mo(1)–O(23)–Mo(3) | 84.9(2)  |
| O(22)–Mo(2)–Mo(1) | 96.0(1)  | Mo(1)–S(1)–Mo(3)  | 66.29(4) |
| O(22)–Mo(2)–Mo(3) | 47.9(1)  | Mo(1)–O(10)–Mo(4) | 134.0(2) |
| O(22)–Mo(2)–N(3)  | 86.2(2)  | Mo(1)–O(20)–Mo(5) | 132.9(2) |
| O(22)–Mo(2)–S(1)  | 101.9(1) | Mo(2)–O(22)–Mo(3) | 83.9(2)  |
| N(3)–Mo(2)–Mo(1)  | 130.7(1) | Mo(2)–S(1)–Mo(3)  | 66.90(4) |
| N(3)–Mo(2)–Mo(3)  | 133.2(1) | Mo(2)–O(1)–Mo(4)  | 120.8(2) |
| N(3)–Mo(2)–S(1)   | 168.6(1) | Mo(3)–O(11)–Mo(5) | 121.3(2) |
| S(1)–Mo(2)–Mo(1)  | 57.04(3) | C(1)–O(1)–Mo(2)   | 122.8(3) |
| S(1)–Mo(2)–Mo(3)  | 56.51(3) | C(1)–O(1)–Mo(4)   | 113.1(3) |
| Mo(1)–Mo(3)–Mo(2) | 59.64(2) | C(2)–O(2)–Mo(4)   | 118.6(4) |
| O(11)–Mo(3)–Mo(1) | 91.9(1)  | C(4)–O(4)–Mo(4)   | 134.8(4) |
| O(11)–Mo(3)–Mo(2) | 141.1(1) | C(6)–O(6)–Mo(2)   | 131.7(4) |
| O(11)–Mo(3)–O(16) | 83.0(2)  | C(7)–O(11)–Mo(3)  | 123.4(3) |
| O(11)–Mo(3)–O(22) | 170.7(2) | C(7)–O(11)–Mo(5)  | 112.7(3) |
| O(11)–Mo(3)–O(23) | 85.6(2)  | C(8)–O(12)–Mo(5)  | 121.3(4) |
| O(11)–Mo(3)–N(5)  | 85.2(2)  | C(10)–O(14)–Mo(5) | 137.0(4) |
| O(11)–Mo(3)–S(1)  | 86.3(1)  | C(12)–O(16)–Mo(3) | 132.0(4) |
| O(16)–Mo(3)–Mo(1) | 145.9(1) | C(13)–N(1)–Mo(1)  | 126.7(4) |
| O(16)–Mo(3)–Mo(2) | 105.4(1) | C(15)–N(1)–Mo(1)  | 126.5(4) |
| O(16)–Mo(3)–O(22) | 93.1(2)  | C(16)–N(3)–Mo(2)  | 127.9(4) |
| O(16)–Mo(3)–O(23) | 162.1(2) | C(18)–N(3)–Mo(2)  | 126.0(4) |

---

|                  |         |                  |          |
|------------------|---------|------------------|----------|
| O(16)–Mo(3)–N(5) | 84.8(2) | C(19)–N(5)–Mo(3) | 122.3(4) |
| O(16)–Mo(3)–S(1) | 88.9(1) | C(21)–N(5)–Mo(3) | 131.8(4) |

---



**Table S9.** Selected bond distances (Å) and angles (°) for *trans*-[(Mo<sup>V</sup>O)<sub>2</sub>O(H<sub>2</sub>homocit)<sub>2</sub>(bpy)<sub>2</sub>] 4H<sub>2</sub>O (**3**).

|                   |           |                   |           |
|-------------------|-----------|-------------------|-----------|
| Mo(1)–O(1)        | 1.949 (1) | Mo(2)–O(9)        | 1.873(1)  |
| Mo(1)–O(2)        | 2.065(2)  | Mo(2)–O(10)       | 1.954(1)  |
| Mo(1)–O(8)        | 1.671(1)  | Mo(2)–O(11)       | 2.070 (1) |
| Mo(1)–O(9)        | 1.861(1)  | Mo(2)–O(17)       | 1.669(1)  |
| Mo(1)–N(1)        | 2.222(2)  | Mo(2)–N(3)        | 2.309(1)  |
| Mo(1)–N(2)        | 2.324(2)  | Mo(2)–N(4)        | 2.237(2)  |
|                   |           |                   |           |
| O(1)–Mo(1)–O(2)   | 78.80(6)  | O(11)–Mo(2)–N(3)  | 83.39(5)  |
| O(1)–Mo(1)–N(1)   | 160.10(6) | O(11)–Mo(2)–N(4)  | 87.89(5)  |
| O(1)–Mo(1)–N(2)   | 91.70(5)  | O(17)–Mo(2)–O(9)  | 101.19(6) |
| O(2)–Mo(1)–N(1)   | 89.99(6)  | O(17)–Mo(2)–O(10) | 109.74(6) |
| O(2)–Mo(1)–N(2)   | 81.25(5)  | O(17)–Mo(2)–O(11) | 97.77(6)  |
| O(8)–Mo(1)–O(1)   | 109.86(6) | O(17)–Mo(2)–N(3)  | 156.21(7) |
| O(8)–Mo(1)–O(2)   | 98.22(6)  | O(17)–Mo(2)–N(4)  | 85.97(6)  |
| O(8)–Mo(1)–O(9)   | 102.04(6) | N(3)–Mo(2)–N(4)   | 70.30(5)  |
| O(8)–Mo(1)–N(1)   | 87.83(6)  | Mo(1)–O(9)–Mo(2)  | 168.00(7) |
| O(8)–Mo(1)–N(2)   | 158.00(6) | C(1)–O(1)–Mo(1)   | 118.9(1)  |
| O(9)–Mo(1)–O(1)   | 92.51(5)  | C(2)–O(2)–Mo(1)   | 116.1(2)  |
| O(9)–Mo(1)–O(2)   | 159.66(5) | C(8)–N(1)–Mo(1)   | 119.7(1)  |
| O(9)–Mo(1)–N(1)   | 92.56(5)  | C(12)–N(1)–Mo(1)  | 121.0(1)  |
| O(9)–Mo(1)–N(2)   | 80.66(5)  | C(13)–N(2)–Mo(1)  | 118.4(1)  |
| N(1)–Mo(1)–N(2)   | 70.20(5)  | C(17)–N(2)–Mo(1)  | 121.8(1)  |
| O(9)–Mo(2)–O(10)  | 91.88(5)  | C(18)–O(10)–Mo(2) | 116.2(1)  |
| O(9)–Mo(2)–O(11)  | 160.74(5) | C(19)–O(11)–Mo(2) | 115.9(1)  |
| O(9)–Mo(2)–N(3)   | 80.64(5)  | C(25)–N(3)–Mo(2)  | 122.2(1)  |
| O(9)–Mo(2)–N(4)   | 96.74(5)  | C(29)–N(3)–Mo(2)  | 118.5(1)  |
| O(10)–Mo(2)–O(11) | 78.48(5)  | C(30)–N(4)–Mo(2)  | 121.4(1)  |
| O(10)–Mo(2)–N(3)  | 93.82(5)  | C(34)–N(4)–Mo(2)  | 120.7(1)  |
| O(10)–Mo(2)–N(4)  | 160.29(6) |                   |           |

**Table S10.** Selected bond distances (Å) and angles (°) for (Et<sub>4</sub>N)[Mo<sup>VI</sup>O<sub>2</sub>Cl(H<sub>2</sub>cit)]·H<sub>2</sub>O (**4**).

|                  |          |                  |          |
|------------------|----------|------------------|----------|
| Mo(1)–Cl(1)      | 2.358(2) | Mo(1)–O(4)       | 2.433(4) |
| Mo(1)–O(1)       | 1.931(4) | Mo(1)–O(8)       | 1.701(4) |
| Mo(1)–O(2)       | 2.178(3) | Mo(1)–O(9)       | 1.690(4) |
| O(1)–Mo(1)–O(2)  | 76.0(2)  | O(9)–Mo(1)–O(1)  | 103.1(2) |
| O(1)–Mo(1)–O(4)  | 76.2(2)  | O(9)–Mo(1)–O(2)  | 95.7(2)  |
| O(1)–Mo(1)–Cl(1) | 150.1(1) | O(9)–Mo(1)–O(4)  | 172.1(2) |
| O(2)–Mo(1)–O(4)  | 76.5(1)  | O(9)–Mo(1)–O(8)  | 103.3(2) |
| O(2)–Mo(1)–Cl(1) | 81.1(1)  | O(9)–Mo(1)–Cl(1) | 98.1(2)  |
| O(8)–Mo(1)–O(1)  | 99.0(2)  | Cl(1)–Mo(1)–O(4) | 80.0(1)  |
| O(8)–Mo(1)–O(2)  | 161.0(2) | C(1)–O(1)–Mo(1)  | 119.9(3) |
| O(8)–Mo(1)–O(4)  | 84.5(2)  | C(2)–O(2)–Mo(1)  | 114.8(3) |
| O(8)–Mo(1)–Cl(1) | 96.5(2)  | C(4)–O(4)–Mo(1)  | 124.8(4) |

1. Z. H. Zhou, C. Y. Chen, Z. X. Cao, K. R. Tsai and Y. L. Chow, *Dalton Trans.*, 2008, 2475-2479.
2. S. Y. Wang, W. T. Jin, H. B. Chen and Z. H. Zhou, *Dalton Trans.*, 2018, **47**, 7412-7421.
3. M. N. Sokolov, S. A. Adonin, A. V. Virovets, P. A. Abramov, C. Vicent, R. Llusar and V. P. Fedin, *Inorg. Chim. Acta*, 2013, **395**, 11-18.
4. Q. L. Chen, H. B. Chen, Z. X. Cao and Z. H. Zhou, *Dalton Trans.*, 2013, **42**, 1627-1636.
5. Y. W. Lin, Y. P. Tong, C. Yang and Y. R. Lin, *Inorg. Chem. Commun*, 2009, **12**, 252-254.
6. B. Modec and P. Bukovec, *Inorg. Chim. Acta*, 2015, **424**, 226-234.
7. S. F. Gheller, T. W. Hambley, R. T. C. Brownlee, M. J. O'Connor, M. R. Snow and A. G. Wedd, *J. Am. Chem. Soc.*, 1983, **105**, 1527-1532.
8. Z. H. Zhou, Q. Xu, J. Lin and S. W. Ng, *Inorg. Chem. Commun*, 2007, **10**, 1461-1464.
9. B. Modec, D. Dolenc and M. Kasunic, *Inorg. Chem.*, 2008, **47**, 3625-3633.
10. A. Bino, F. A. Cotton and Z. Dori, *J. Am. Chem. Soc.*, 1979, **101**, 3842-3847.
11. J. Zhao and L. Xu, *Eur. J. Inorg. Chem.*, 2011, **2011**, 4096-4102.
12. P. A. Abramov, A. Yu Laricheva, E. V. Peresyphkina, I. V. Mirzaeva, N. K. Moroz and M. N. Sokolov, *Inorg. Chim. Acta*, 2012, **383**, 7-12.
13. H. Kawasaki, G. Sakane and T. Shibahara, *Inorg. Chem. Commun*, 2005, **8**, 777-781.
